# Supplementary material for: A multi-level spillover risk assessment for the largest chikungunya virus outbreak in China
Source: Research Square preprint supplement (doi:10.21203/rs.3.rs-7494491/v1), 2025-09-09
Supplement: Supplementary file 1 [file 9e1943ed83ff8124665c7eb8.docx]

SUPPLEMENTARY INFORMATION

**A multi-level spillover risk assessment for chikungunya virus in China: insights from the 2025 Foshan outbreak**

[Table S1. Street-level gravity spillover proportions (rank) in Foshan 2](#_Toc1782527662)

[Table S2. CHIKV spillover cases by district in Foshan, 2025 4](#_Toc1545539584)

[Table S3. Normalized gravity values for each city–street ID 6](#_Toc2069077823)

[Table S4. Provincial reported spillover cases 11](#_Toc788275290)

[Fig. S1. Temporal gaussian distribution of imported cases 12](#_Toc716180687)

[Fig. S2. Model structure and assumptions 13](#_Toc202964974)

[Table S5. Model compartments: symbols, descriptions 15](#_Toc1028286582)

[Table S6. Model parameters and values 16](#_Toc1611676265)

[Table S7. Parameter descriptions, distributions, and values for the Index P 17](#_Toc1231746244)

[Table S8. National four-tier transmission-risk classification and historical outbreak weights 18](#_Toc216765828)

[Fig. S3-S33 Provincial Index P maps 22](#_Toc1051005884)

[Reference 53](#_Toc1202895813)

Table S1. Street-level gravity spillover proportions (rank) in Foshan

| Table S1. Street-level gravity spillover proportions (rank) in Foshan | | |
| --- | --- | --- |
| target_Chinese | target | gravity spillover proportion |
| 石湾镇街道 | shiwan | 0.329295851 |
| 祖庙街道 | zumiao | 0.214795825 |
| 桂城街道 | guicheng | 0.093699768 |
| 张槎街道 | zhangcha | 0.075817072 |
| 陈村镇 | chen | 0.049808419 |
| 大沥镇 | dali | 0.039169249 |
| 伦教街道 | lunjiao | 0.036164717 |
| 大良街道 | daliang | 0.034432711 |
| 龙江镇 | longjiang | 0.027691407 |
| 容桂街道 | ronggui | 0.025247646 |
| 勒流街道 | leiliu | 0.023953597 |
| 南庄镇 | nanzhuang | 0.019174736 |
| 狮山镇 | shishan | 0.009161293 |
| 九江镇 | jiujiang | 0.004214469 |
| 西樵镇 | xiqiao | 0.003386235 |
| 杏坛镇 | xingtan | 0.002860074 |
| 荷城街道 | hecheng | 0.002756228 |
| 里水镇 | lishui | 0.002512671 |
| 均安镇 | junan | 0.001667932 |
| 西南街道 | xinan | 0.001567906 |
| 丹灶镇 | danzao | 0.001436318 |
| 云东海街道 | yundonghai | 0.000450047 |
| 乐平镇 | leping | 0.00034207 |
| 白坭镇 | baini | 0.000245037 |
| 大塘镇 | datang | 4.22E-05 |
| 杨和镇 | yanghe | 3.80E-05 |
| 明城镇 | mingcheng | 2.78E-05 |
| 芦苞镇 | lubao | 2.76E-05 |
| 更合镇 | genghe | 8.86E-06 |
| 南山镇 | nanshan | 4.25E-06 |

Table S2. CHIKV spillover cases by district in Foshan, 2025

| **Table S2. CHIKV spillover cases by district in Foshan, 2025** | | | | | | | |
| --- | --- | --- | --- | --- | --- | --- | --- |
| **Date** | **Shunde District** | **Chancheng District** | **Nanhai District** | **Sanshui District** | **Gaoming District** | **Cumulative Cases** | **Main Sources** |
| 2025/7/8 | 1 imported case | 0 | 0 | 0 | 0 | 1 | [1] |
| 2025/7/15 | 478 cases, mainly in Lecong, Beijiao, Chencun streets | 0 | 0 | 0 | 0 | 478 | [1] |
| 2025/7/19 | 1,790 cases, mainly in Lecong, Beijiao, Chencun streets | 49 cases, mainly in Shiwanzhen, Zumiao, Zhangcha subdistricts | 34 cases, mainly in Guicheng subdistrict | Not reported | Not reported | 1,873 | [2] |
| 2025/7/20 | 2,158 cases, mainly in Lecong, Beijiao, Chencun streets | 69 cases, mainly in Shiwanzhen, Zumiao, Zhangcha subdistricts | 58 cases, mainly in Guicheng subdistrict | 0 | 0 | 2,285 | [3] |
| 2025/7/21 | 2,471 cases, mainly in Lecong, Beijiao, Chencun streets | 100 cases, mainly in Shiwanzhen, Zumiao, Zhangcha subdistricts | 84 cases, mainly in Guicheng subdistrict | 3 cases, mainly in Xinan subdistrict, Datang street | 0 | 2,658 | [2], [4] |
| 2025/7/22 | 2,934 cases, mainly in Lecong, Beijiao, Chencun streets | 147 cases, mainly in Shiwanzhen, Zumiao, Zhangcha subdistricts | 107 cases, mainly in Guicheng subdistrict | 5 cases, mainly in Xinan subdistrict and Yundonghai subdistrict | 1 case in Hecheng subdistrict | 3,194 | [5] |
| 2025/7/23 | 3,317 cases, mainly in Lecong, Beijiao, Chencun streets | 178 cases, mainly in Shiwanzhen, Zumiao, Zhangcha subdistricts | 141 cases, mainly in Guicheng subdistrict | 6 cases, mainly in Xinan subdistrict and Yundonghai subdistrict | 3 cases in Hecheng subdistrict | 3,645 | [6], [7] |
| 2025/7/24 | 3,627 | 210 | 169 | 8 | 3 | 4,014 | — |
| From July 8, 2025, Shunde District reported 1 imported case, with no cases in other districts【1】. By July 15, all 478 cases were concentrated in Shunde, mainly in Lecong, Beijiao, and Chencun streets【1】. On July 19, Shunde (1,790 cases) remained the main affected district, with cases concentrated in Lecong, Beijiao, and Chencun; Chancheng (49 cases) mainly in Shiwanzhen, Zumiao, and Zhangcha subdistricts; Nanhai (34 cases) mainly in Guicheng subdistrict; Sanshui and Gaoming had no reported cases【2】. On July 20, the distribution pattern was similar: Shunde (2,158) mainly in Lecong, Beijiao, and Chencun; Chancheng (69) in Shiwanzhen, Zumiao, Zhangcha; Nanhai (58) in Guicheng; Sanshui and Gaoming reported no cases【3】. By July 21, Shunde (2,471) still led, concentrated in Lecong, Beijiao, and Chencun; Chancheng (100) in Shiwanzhen, Zumiao, Zhangcha; Nanhai (84) in Guicheng; Sanshui (3) in Xinan and Datang; Gaoming had no cases【2】【4】. On July 22, Shunde (2,934) remained highest, mainly in Lecong, Beijiao, and Chencun; Chancheng (147) in Shiwanzhen, Zumiao, Zhangcha; Nanhai (107) in Guicheng; Sanshui (5) in Xinan and Yundonghai; Gaoming (1) in Hecheng【5】. On July 23, the situation persisted: Shunde (3,317) in Lecong, Beijiao, and Chencun; Chancheng (178) in Shiwanzhen, Zumiao, Zhangcha; Nanhai (141) in Guicheng; Sanshui (6) in Xinan and Yundonghai; Gaoming (3) in Hecheng【6】【7】. By July 24, Shunde, Chancheng, and Nanhai remained the primary affected areas; Sanshui had small numbers in Xinan and Yundonghai; Gaoming possibly recorded zero cases. | | | | | | | |

Table S3. Normalized gravity values for each city–street ID

| Table S3. Normalized gravity values for each city–street ID | | | | | |
| --- | --- | --- | --- | --- | --- |
| Rank | City-street ID | Normalized gravity ratio | Rank | City-street ID | Normalized gravity ratio |
| 1 | fs-shiwan | 0.064133297 | 105 | gz-qianjin | 0.002785333 |
| 2 | fs-zumiao | 0.038151638 | 106 | gz-jingtai | 0.002622983 |
| 3 | gz-longjin | 0.02633717 | 107 | gz-helong | 0.002512408 |
| 4 | gz-fengyuan | 0.024217742 | 108 | fs-jiujiang | 0.002460166 |
| 5 | fs-chencun | 0.023972161 | 109 | gz-dalong | 0.002361041 |
| 6 | gz-hualin | 0.020439596 | 110 | jm-beijie | 0.002331222 |
| 7 | fs-zhangcha | 0.019456004 | 111 | gz-shamian | 0.00229342 |
| 8 | gz-jinhua | 0.018373502 | 112 | gz-nancun | 0.002215415 |
| 9 | gz-changgang | 0.017553706 | 113 | jm-jiaobei | 0.002162908 |
| 10 | gz-sushe | 0.017110457 | 114 | gz-yuangang | 0.002146481 |
| 11 | gz-shayuan | 0.016939388 | 115 | gz-qiaonan | 0.002122053 |
| 12 | gz-caihong | 0.016611629 | 116 | gz-wushan | 0.002033763 |
| 13 | gz-dadong | 0.016239737 | 117 | gz-huazhou | 0.001965275 |
| 14 | fs-guicheng | 0.015954043 | 118 | gz-shijing | 0.001750463 |
| 15 | gz-jiangnanzhong | 0.015755783 | 119 | gz-huangpu | 0.001726167 |
| 16 | fs-lunjiao | 0.015304545 | 120 | gz-yongping | 0.001615101 |
| 17 | gz-guangta | 0.014771198 | 121 | gz-liuhua | 0.001566151 |
| 18 | gz-longfeng | 0.01442546 | 122 | gz-shiji | 0.001551745 |
| 19 | gz-zhuguang | 0.013573351 | 123 | fs-xingtan | 0.001472322 |
| 20 | gz-duobao | 0.012473217 | 124 | gz-xiaoguwei | 0.001378832 |
| 21 | gz-haichuang | 0.012082724 | 125 | fs-xiqiao | 0.001356778 |
| 22 | gz-lingnan | 0.011898787 | 126 | gz-guanzhou | 0.001344012 |
| 23 | gz-ruibao | 0.011564646 | 127 | jm-shaping | 0.001336266 |
| 24 | gz-meihuacun | 0.011553365 | 128 | gz-changxing | 0.001301013 |
| 25 | gz-fengyang | 0.010633786 | 129 | fs-shishan | 0.001206808 |
| 26 | gz-baihedong | 0.010313675 | 130 | gz-baiyunhu | 0.001143881 |
| 27 | gz-binjiang | 0.010307128 | 131 | zs-nantou | 0.001123568 |
| 28 | gz-jianshe | 0.00993149 | 132 | gz-xintang | 0.001046964 |
| 29 | gz-nanshitou | 0.00975377 | 133 | gz-longdong | 0.001027682 |
| 30 | gz-nanyuan | 0.009714752 | 134 | fs-junan | 0.001024225 |
| 31 | gz-zhanqian | 0.009441317 | 135 | gz-huangcun | 0.001009222 |
| 32 | gz-datang | 0.009392298 | 136 | gz-wenchong | 0.000942378 |
| 33 | gz-shiqiao | 0.009280435 | 137 | gz-yuzhu | 0.000942253 |
| 34 | gz-renmin | 0.009257943 | 138 | zs-xiaolan | 0.000917245 |
| 35 | fs-longjiang | 0.009091851 | 139 | gz-junhe | 0.000900364 |
| 36 | gz-nanhuaxi | 0.009068642 | 140 | gz-pazhou | 0.000843109 |
| 37 | gz-xingang | 0.00873051 | 141 | jm-huanshi | 0.000839861 |
| 38 | gz-beijing | 0.008567514 | 142 | fs-danzao | 0.000762225 |
| 39 | gz-liurong | 0.008416144 | 143 | fs-lishui | 0.000761056 |
| 40 | gz-tongde | 0.008386354 | 144 | gz-tonghe | 0.000724786 |
| 41 | gz-nonglin | 0.008196184 | 145 | fs-gaomingjianyu* | 0.000723976 |
| 42 | fs-leiliu | 0.008153371 | 146 | fs-foshanjianyu* | 0.000723976 |
| 43 | gz-xicun | 0.007966082 | 147 | gz-xinhua | 0.000676074 |
| 44 | gz-shipai | 0.007652669 | 148 | gz-nangang | 0.000651462 |
| 45 | gz-jianghai | 0.007581556 | 149 | gz-shimen | 0.000640361 |
| 46 | gz-chongkou | 0.007446865 | 150 | zs-dongfeng | 0.000597222 |
| 47 | gz-huale | 0.007440498 | 151 | gz-xinzao | 0.00057238 |
| 48 | gz-chajiao | 0.007287165 | 152 | zs-gu | 0.000562911 |
| 49 | gz-dashi | 0.007214485 | 153 | gz-hongshan | 0.000547624 |
| 50 | gz-dongjiao | 0.007114481 | 154 | gz-suidong | 0.000518169 |
| 51 | gz-huadi | 0.007057526 | 155 | gz-lilian | 0.000513833 |
| 52 | gz-changhua | 0.007048227 | 156 | fs-hecheng | 0.000509016 |
| 53 | fs-nanzhuang | 0.006862204 | 157 | gz-zhangzhou | 0.000498833 |
| 54 | fs-daliang | 0.006615382 | 158 | gz-dasha | 0.000483342 |
| 55 | gz-chigang | 0.006612014 | 159 | jm-baisha | 0.000466284 |
| 56 | gz-shahe | 0.006488113 | 160 | gz-fenghuang | 0.000460602 |
| 57 | gz-dongshan | 0.006384706 | 161 | gz-lanhe | 0.00042119 |
| 58 | fs-dali | 0.006211385 | 162 | gz-yunpu | 0.000371866 |
| 59 | gz-shiweitang | 0.00611425 | 163 | fs-xinan | 0.000370631 |
| 60 | gz-tangjing | 0.005913251 | 164 | fs-yundonghai | 0.000351903 |
| 61 | jm-jiangnan | 0.005892925 | 165 | zs-dongsheng | 0.000348551 |
| 62 | gz-huanghuagang | 0.005768797 | 166 | jm-hetang | 0.000337056 |
| 63 | gz-zhongcun | 0.005677139 | 167 | jm-waihai | 0.000334918 |
| 64 | gz-kuangquan | 0.005424972 | 168 | zs-huangpu | 0.000320834 |
| 65 | gz-tianhenan | 0.005076937 | 169 | gz-dongyong | 0.00031716 |
| 66 | gz-jiahe | 0.005016657 | 170 | fs-baini | 0.000306134 |
| 67 | gz-tangxia | 0.005016056 | 171 | fs-shengdierjiedulaojiaosuo* | 0.00028977 |
| 68 | gz-hongqiao | 0.00499072 | 172 | fs-guangzhoujunqusanshuinongchang* | 0.00028977 |
| 69 | gz-chebei | 0.004683061 | 173 | fs-shengsanshuilaojiaosuo* | 0.00028977 |
| 70 | gz-zhuji | 0.004606071 | 174 | fs-shengnvzilaojiaosuo* | 0.00028977 |
| 71 | gz-luopu | 0.004605164 | 175 | gz-xiagang | 0.000286876 |
| 72 | fs-lecong | 0.004577088 | 176 | gz-xinya | 0.000279747 |
| 73 | fs-beijiao | 0.004577088 | 177 | jm-chaolian | 0.000260881 |
| 74 | fs-ronggui | 0.004391516 | 178 | zs-fusha | 0.000239562 |
| 75 | gz-nanzhou | 0.00423633 | 179 | zs-henglan | 0.000204589 |
| 76 | gz-xinshi | 0.004195235 | 180 | gz-xiuquan | 0.000200331 |
| 77 | gz-xinghua | 0.004131358 | 181 | gz-dagang | 0.000196965 |
| 78 | gz-shatou | 0.004124938 | 182 | fs-duichuanchachang* | 0.000195558 |
| 79 | gz-zhongnan | 0.004066143 | 183 | gz-jianggao | 0.000193626 |
| 80 | gz-xintang | 0.004055845 | 184 | gz-renhe | 0.000190307 |
| 81 | gz-yuancun | 0.003894782 | 185 | gz-lianhe | 0.000187259 |
| 82 | gz-qiaozhong | 0.003853518 | 186 | gz-nansha | 0.000186998 |
| 83 | gz-hailong | 0.003761027 | 187 | jm-tangxia | 0.000173686 |
| 84 | gz-jinsha | 0.003719346 | 188 | gz-shilou | 0.000172141 |
| 85 | gz-dongsha | 0.00370767 | 189 | gz-hualong | 0.000171297 |
| 86 | gz-linhe | 0.003694959 | 190 | zs-sanjiao | 0.000170572 |
| 87 | gz-tianyuan | 0.003643101 | 191 | zs-gangkou | 0.000149266 |
| 88 | gz-yuncheng | 0.003539058 | 192 | fs-leping | 0.000146777 |
| 89 | gz-songzhou | 0.003410906 | 193 | gz-huangge | 0.000134227 |
| 90 | gz-dengfeng | 0.00327107 | 194 | jm-duruan | 0.000124444 |
| 91 | gz-baiyun | 0.00326023 | 195 | jm-gulao | 0.000109926 |
| 92 | gz-xiancun | 0.003092814 | 196 | gz-zhongluotan | 8.38E-05 |
| 93 | jm-jiaotou | 0.003072725 | 197 | gz-luogang | 8.24E-05 |
| 94 | jm-didong | 0.003072725 | 198 | jm-taoyuan | 7.71E-05 |
| 95 | jm-canghou | 0.003072725 | 199 | gz-hengli | 7.25E-05 |
| 96 | gz-donghuan | 0.003031018 | 200 | jm-yayao | 6.76E-05 |
| 97 | gz-huangshi | 0.002967717 | 201 | gz-zhujiang | 6.51E-05 |
| 98 | gz-sanyuanli | 0.002966397 | 202 | gz-taihe | 6.25E-05 |
| 99 | gz-jingxi | 0.002965802 | 203 | zs-minzhong | 5.68E-05 |
| 100 | gz-shadong | 0.002873246 | 204 | gz-tanbu | 4.35E-05 |
| 101 | jm-baisha | 0.002858965 | 205 | fs-yanghe | 4.08E-05 |
| 102 | gz-shibi | 0.002844029 | 206 | fs-mingcheng | 3.69E-05 |
| 103 | gz-shawan | 0.002817655 | 207 | jm-longkou | 3.12E-05 |
| 104 | gz-liede | 0.002800436 | 208 | jm-hecheng | 1.62E-05 |
| * Partially derived from spatial interpolation due to missing population data. | | | | | |

Table S4. Provincial reported spillover cases

| Table S4. Provincial reported spillover cases | | |
| --- | --- | --- |
| city name | spillover reported cases | proportion |
| Guangzhou | 22 | 37.93% |
| Zhongshan | 18 | 31.03% |
| Dongguan | 3 | 5.17% |
| Zhuhai | 3 | 5.17% |
| Heyuan | 3 | 5.17% |
| Jiangmen | 2 | 3.45% |
| Yangjiang | 2 | 3.45% |
| Zhaoqing | 2 | 3.45% |
| Qingyuan | 1 | 1.72% |
| Shenzhen | 1 | 1.72% |
| Zhnajiang | 1 | 1.72% |
| Other | 12 | 17.10% |
| Total | 70 | 100.00% |
| Percentages in the third column use all reported spillover cases as denominator (n = 70). | | |

Fig. S1. Temporal gaussian distribution of imported cases


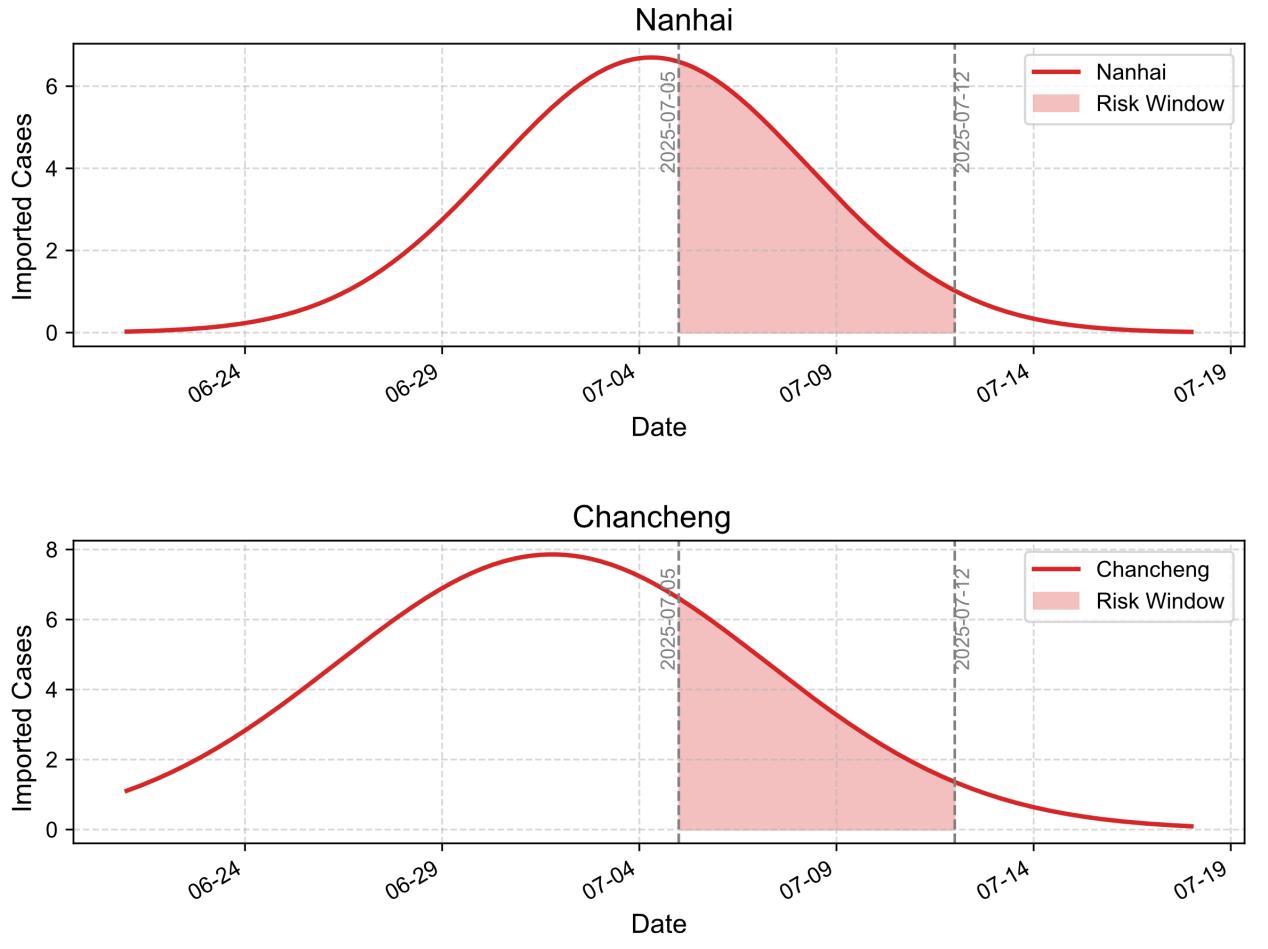

Fig S1. Temporal Gaussian distribution of imported cases

(Chancheng district at ~7.6 days after outbreak onset () and for Nanhai district at ~9.5 days (), : the timing of the peak, i.e., when imported infections reached their maximum after outbreak onset. : the spread or duration of the importation wave. A larger σ indicates a longer and more prolonged inflow, while a smaller σ reflects a shorter and more concentrated period of importation. : the intensity or magnitude of the peak, reflecting the maximum level of imported infections at that time.

Fig. S2. Model structure and assumptions


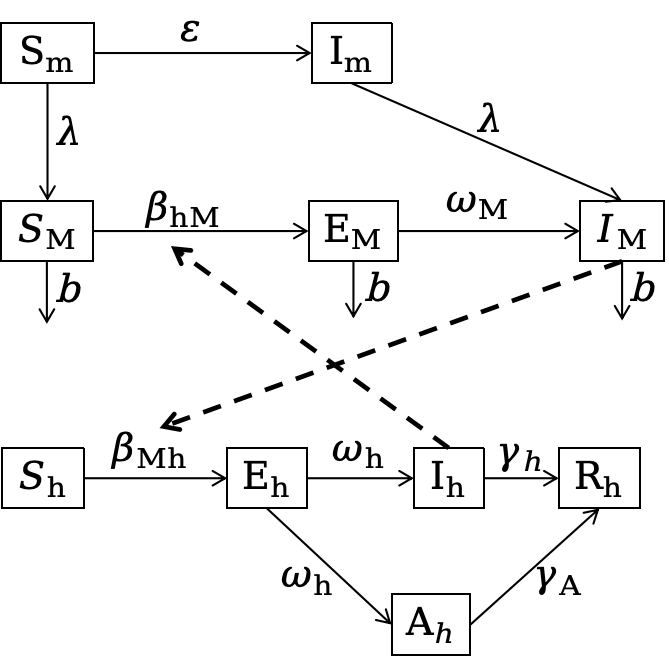


Fig S2. Model structure

The model is based on the following assumptions:

1. Human population compartments: The human population is divided into five compartments: susceptible (), exposed (), sysptomatic infected (), asymptomatic Infected (), recovered (). A susceptible individual bitten by an infectious adult mosquito has a certain probability of becoming infected and subsequently enters the exposed state (), representing the latent stage of infection. Exposed individuals progress to either symptomatic infect () asymptomatic infected () according to a fixed proprotion q, which denotes the probability of asymptomatic infection. Both and eventually recover and move into the recovered class (), where they are assumed to acquire long-lasting immunity. Over the time horizon of the model, the total human population size is assumed constant, with demographic processes such as births and natural deaths neglected.
2. Mosquito population compartments: The mosquito life cycle is divided into larval and adult stages, denoted by the subscripts m and M,respectively. The larval stage includes susceptible larvae (), and infected larvae (), while the adult stage consists of susceptible mosquitoes (), exposed mosquitoes (), and infected mosquitoes (). Larvae deveplop into adult mosquitoes through emergence, occuring at a constant rate . infected larvae () emerge as infected adults (), while susceptible larvaes emerge as susceptible adults ().
3. Transmission and disease progression: Transmission between humans and mosquitoes occurs via bites, under the assumption of homogeneous mixing, where all individuals face the same risk of being bitten. When an infectious mosquito bites a susceptible human, there is a probability that the human becomes infected and enters the exposed class (). Both symptomatic and asymptomatic human infections (, ) can infect susceptible mosquitoes, causing them to move into the exposed class (), which later progresses to the infectious stage (). Humans in progress to either or infections, while msoquitoes in progress to infected mosquitoes () and remain infectious for life.
4. Population dynamics and vertical transmission: The human population is considered demographically stable during the epidemic phase, while mosquito populations undergo natural birth, emergence, and death processes. Vertical transmission is included: infectious adult mosquitoes () can lay eggs that hatch into infected larvae (), with the probability of transovarial transmission denoted by . Once infected, mosquitoes remain infectious until death, whereas humans who recover are assumed immune and cannot be reinfected within the model period. In contrast, human infectious individuals (, ) eventually recover and lose infectiousness, moving into the recovered () where they are assumed to acquire immunity.

Table S5. Model compartments: symbols, descriptions

| Table S5. Model compartments: symbols, descriptions | |
| --- | --- |
| Symbol | Description |
|  | Susceptible larvaes |
|  | Infected larvaes |
|  | Susceptible adult mosquitoes |
|  | Exposed adult mosquitoes |
|  | Symptomatic Infected mosquitoes |
|  | Susceptible humans |
|  | Exposed humans |
|  | Symptomatic Infected humans |
|  | Asymptomatic Infected humans |
|  | Recovered humans |

Table S6. Model parameters and values

| Table S6. Model parameters and values | | | | | |
| --- | --- | --- | --- | --- | --- |
| Parameter | Description | Unit | Value | Range | Source |
|  | Birth rate of Aedes mosquitoes |  | 0.071 | 0.02-0.25 | (1, 2) |
|  | Proportion of infected adult females that transmit the pathogen to their offspring via eggs |  | 0.1 | 0.014-0.174 | (3) |
|  | The average maturation rate from immature stages (larvae/pupae) to adults |  | 0.1176 | 0.09434 -0.12195 | (4) |
|  | Seasonality coefficient for Aedes population dynamics | 1 |  | - | Model fitting |
|  | Natural mortality rate of adult mosquitoes |  | 0.0714 | ≥0 | (1, 2) |
|  | Transmission rate from humans to mosquitoes |  |  | ≥0 | Model fitting |
|  | Transmission rate from mosquitoes to humans |  |  | ≥0 |  |
|  | Mosquito incubation rate |  | 0.1 | 0.0833-0.1250 | (5) |
|  | Human incubation rate |  | 0.1429 | 0.0833-0.5 | (6) |
|  | Proportion of asymptomatic human infections |  | 0.14 | 0-1 | (7) |
|  | Recovery rate of symptomatic humans |  | 0.143 | 0.0714-.0333 | (5) |
|  | Recovery rate of asymptomatic humans |  | 0.143 | 0.0714-.0333 | (1, 2) |

Table S7. Parameter descriptions, distributions, and values for the Index P

| Table S7. Parameter descriptions, distributions, and values for the Index P | | | | | |
| --- | --- | --- | --- | --- | --- |
| Symbol | Description | Distribution | Mean, SD | Units | Sources |
|  | Adult Aedes biting rate | normal | 0.25, 0.01 |  | (8, 9) |
|  | Adult Aedes lifespan | normal | 10, 2.55 |  | (10, 11) |
|  | Extrinsic Aedes-DENV incubation period | lognormal | 1228, 1825 (∞,15 °C) |  | (12) |
| 232, 181 [15 °C, 17.5 °C) |  |
| 72.4, 32.6 [17.5 °C, 20 °C) |  |
| 28.9, 7.64 [20 °C, 22.5 °C) |  |
| 14.7, 2.66 [22.5 °C, 25 °C) |  |
| 8.68, 1.31 [25 °C, 27.5 °C) |  |
| 5.76, 0.87 [27.5 °C, 30 °C) |  |
| 4.14, 0.63 [30 °C, 32.5 °C) |  |
| 3.19, 0.48 [32.5 °C, ∞) |  |
|  | Intrinsic human-DENV incubation period | lognormal | 5.94, 1.80 |  | (12) |
|  | Human-DENV infectious period | normal | 4, 0.51 |  | (13-15) |
|  | Human lifespan | normal | 70, 3 |  | - |
|  | Transmission probability per mosquito bite (Aedes-to-human) | none | N/A | N/A | N/A |
|  | Transmission probability per mosquito bite (human-to-Aedes) | none | N/A | N/A | N/A |

Table S8. National four-tier transmission-risk classification and historical outbreak weights

| Table S8. National four-tier transmission-risk classification and historical outbreak weights | | | | | |
| --- | --- | --- | --- | --- | --- |
| **Province** | **Tier** | **Historical magnitude (cases)** | **Historical share (%)** | **Final historical weight (%)** | **Allocation rule** |
| **Guangdong** | I | 68,070 | 57.74 | **57.74** | Direct (harmonized historical magnitude) |
| **Yunnan** | I | 30,785 | 26.11 | **26.11** | Direct |
| **Fujian** | I | 3,742 | 3.17 | **3.17** | Direct |
| **Zhejiang** | I | 3,260 | 2.77 | **2.77** | Direct |
| **Guangxi** | I | 3,136 | 2.66 | **2.66** | Direct |
| **Hainan** | I | — | — | **0.0789** | No harmonized historical record (captured by other modules) |
| **Shanghai** | II | — | — | **0.4545** | Tier II (5% / 11) |
| **Jiangsu** | II | — | — | **0.4545** | Tier II |
| **Anhui** | II | — | — | **0.4545** | Tier II |
| **Jiangxi** | II | — | — | **0.4545** | Tier II |
| **Shandong** | II | — | — | **0.4545** | Tier II |
| **Henan** | II | — | — | **0.4545** | Tier II |
| **Hubei** | II | — | — | **0.4545** | Tier II |
| **Hunan** | II | — | — | **0.4545** | Tier II |
| **Chongqing** | II | — | — | **0.4545** | Tier II |
| **Sichuan** | II | — | — | **0.4545** | Tier II |
| **Guizhou** | II | — | — | **0.4545** | Tier II |
| **Beijing** | III | — | — | **0.25** | Tier III (2% / 8) |
| **Tianjin** | III | — | — | **0.25** | Tier III |
| **Hebei** | III | — | — | **0.25** | Tier III |
| **Shanxi** | III | — | — | **0.25** | Tier III |
| **Liaoning** | III | — | — | **0.25** | Tier III |
| **Tibet (Xizang)** | III | — | — | **0.25** | Tier III |
| **Shaanxi** | III | — | — | **0.25** | Tier III |
| **Gansu** | III | — | — | **0.25** | Tier III |
| **Inner Mongolia** | IV | — | — | **0.0786** | Tier IV residual (0.55% / 7) |
| **Jilin** | IV | — | — | **0.0786** | Tier IV residual |
| **Heilongjiang** | IV | — | — | **0.0786** | Tier IV residual |
| **Qinghai** | IV | — | — | **0.0786** | Tier IV residual |
| **Ningxia** | IV | — | — | **0.0786** | Tier IV residual |
| **Xinjiang** | IV | — | — | **0.0786** | Tier IV residual |
|  |  |  |  |  |  |

Fig. S3-S33 Provincial Index P maps


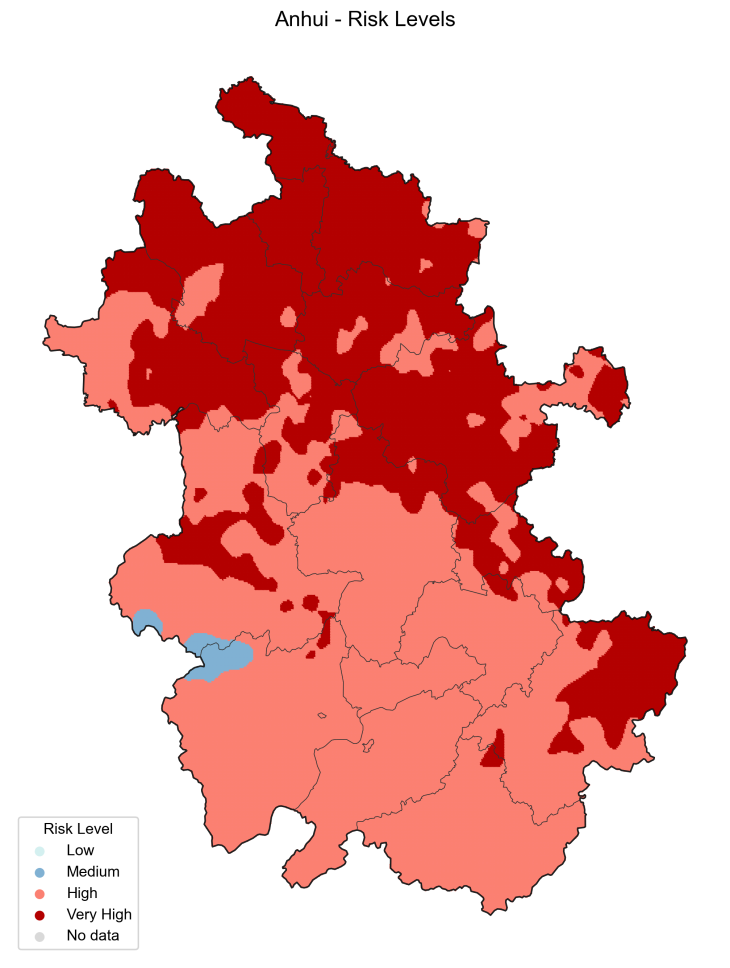


Figure S3 Anhui


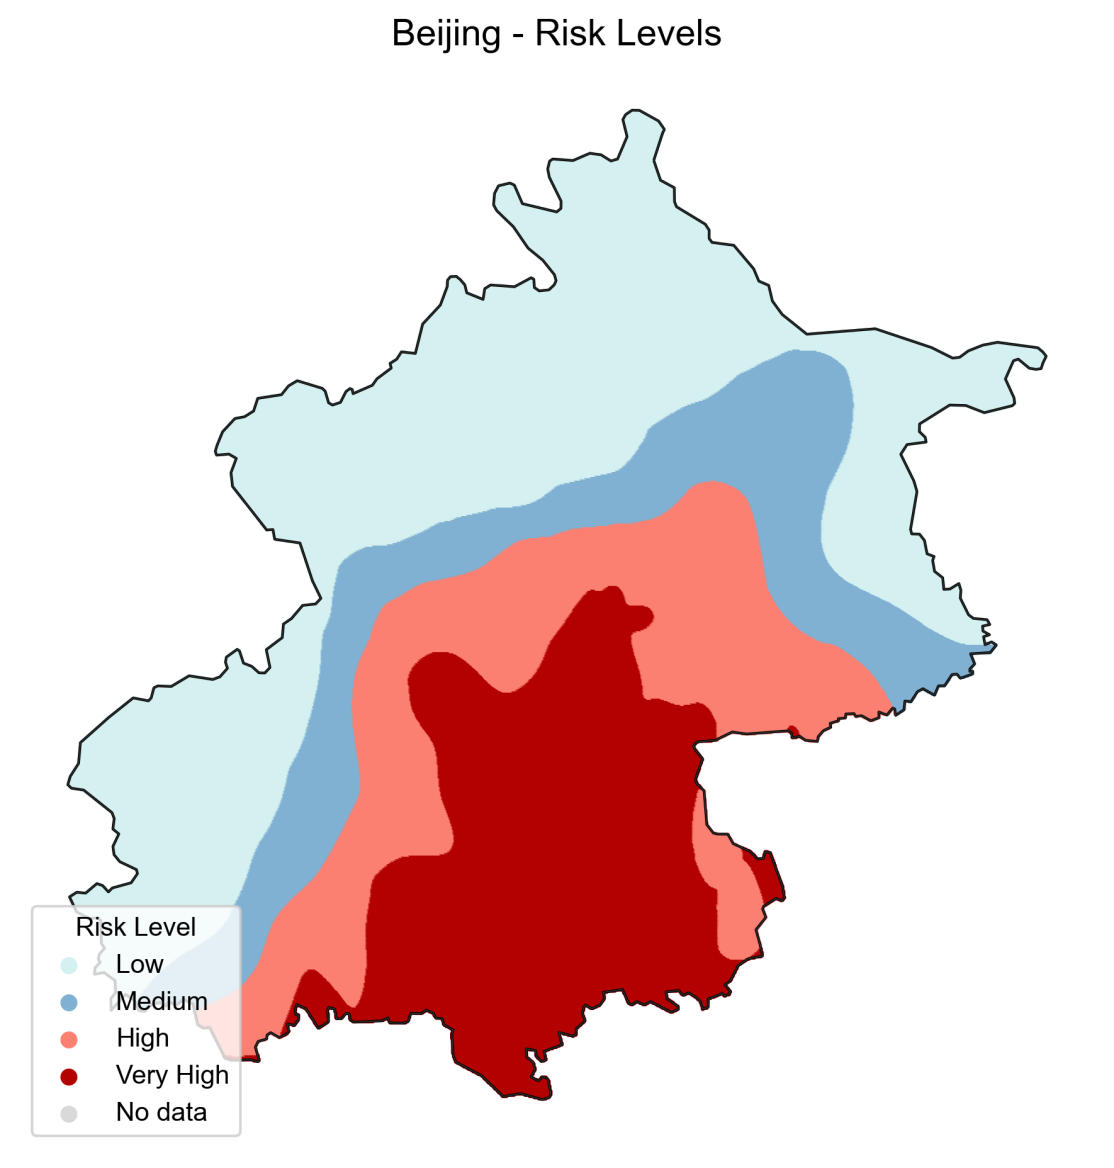


Figure S4. Beijing


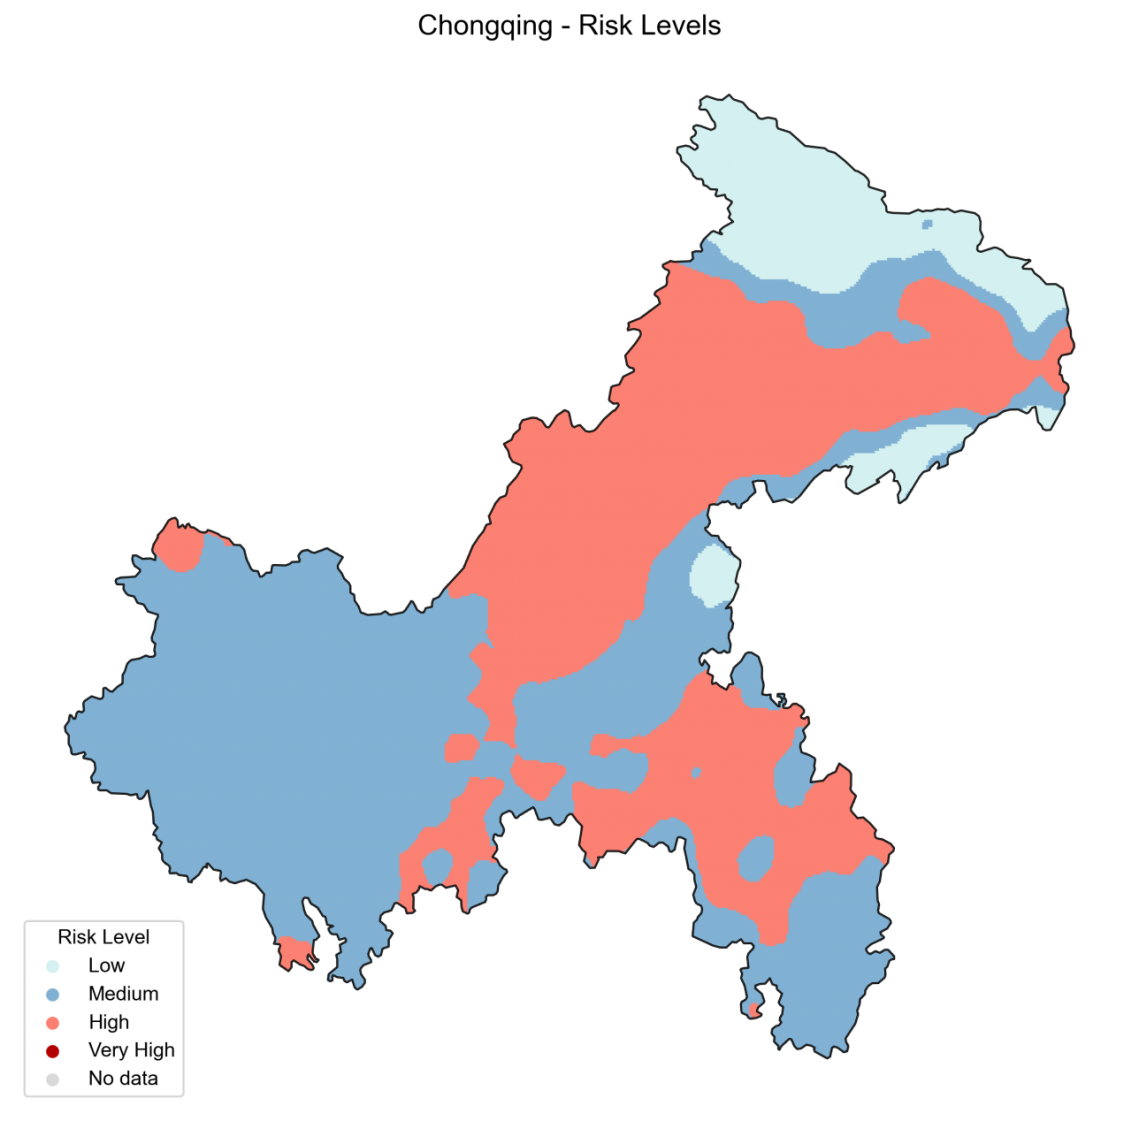


Figure S5. Chongqing


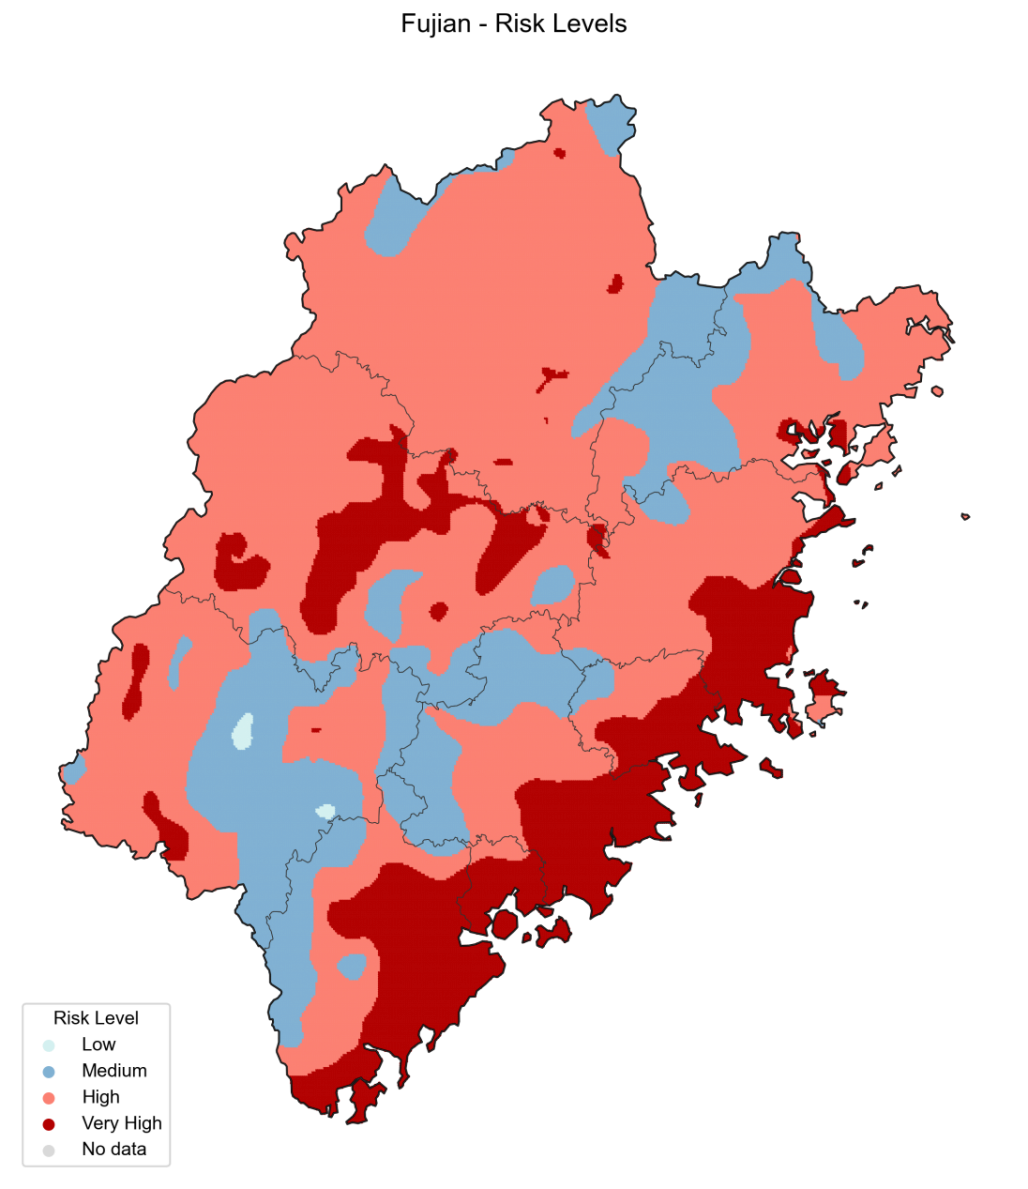


Figure S6. Fujian


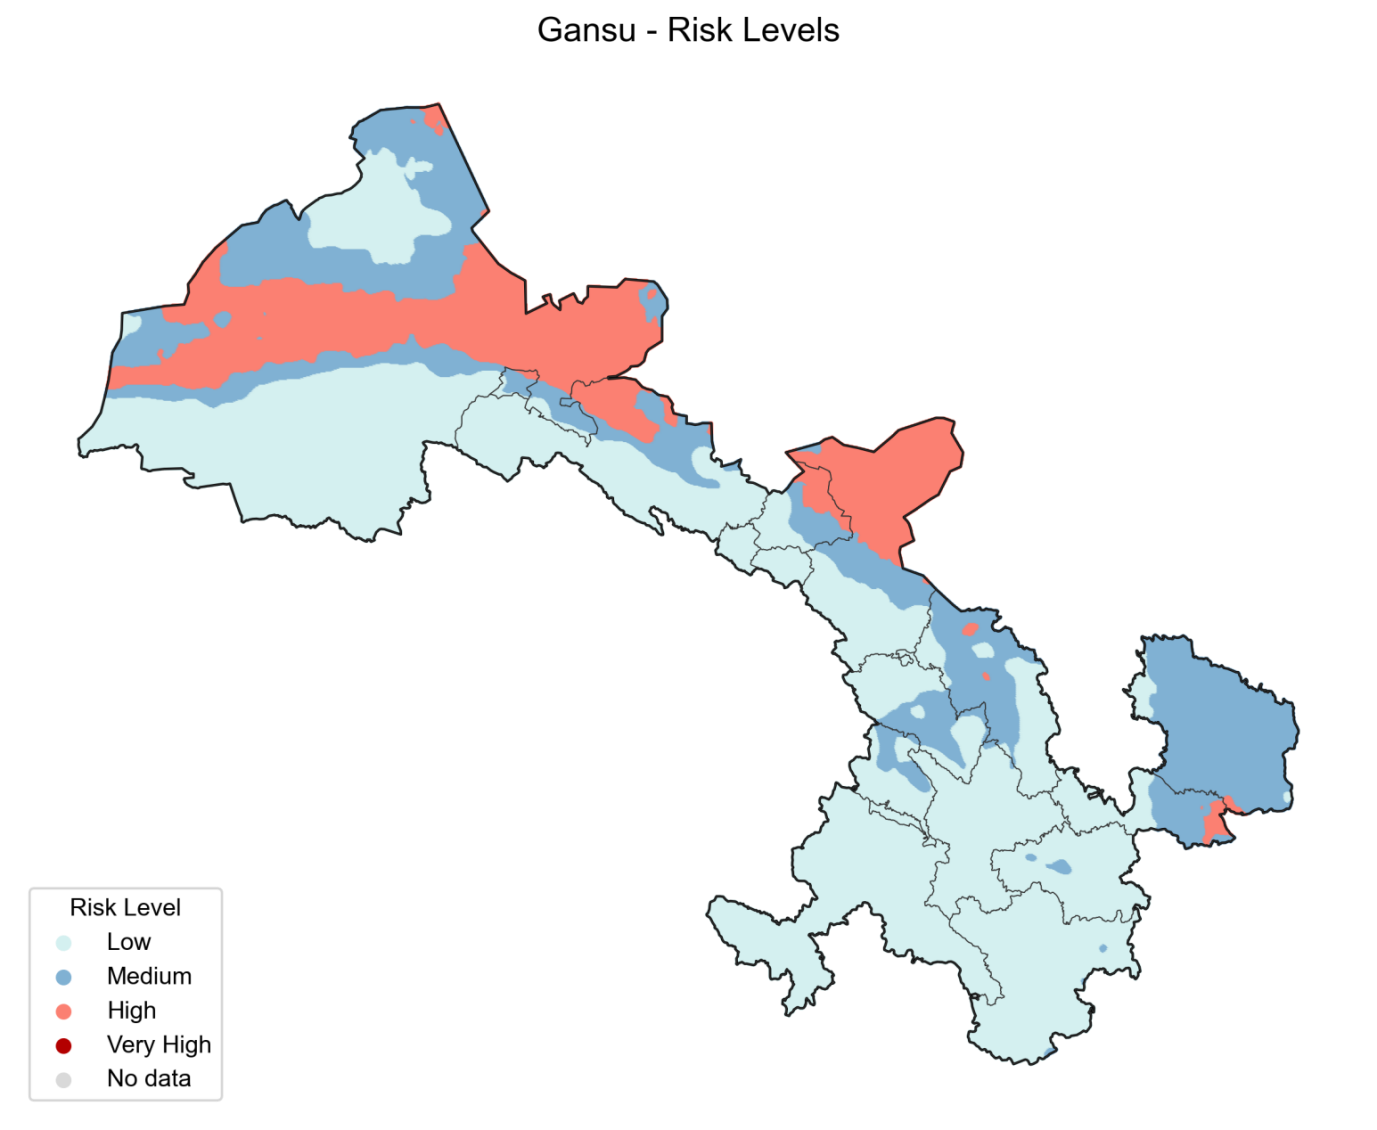


Figure S7. Gansu


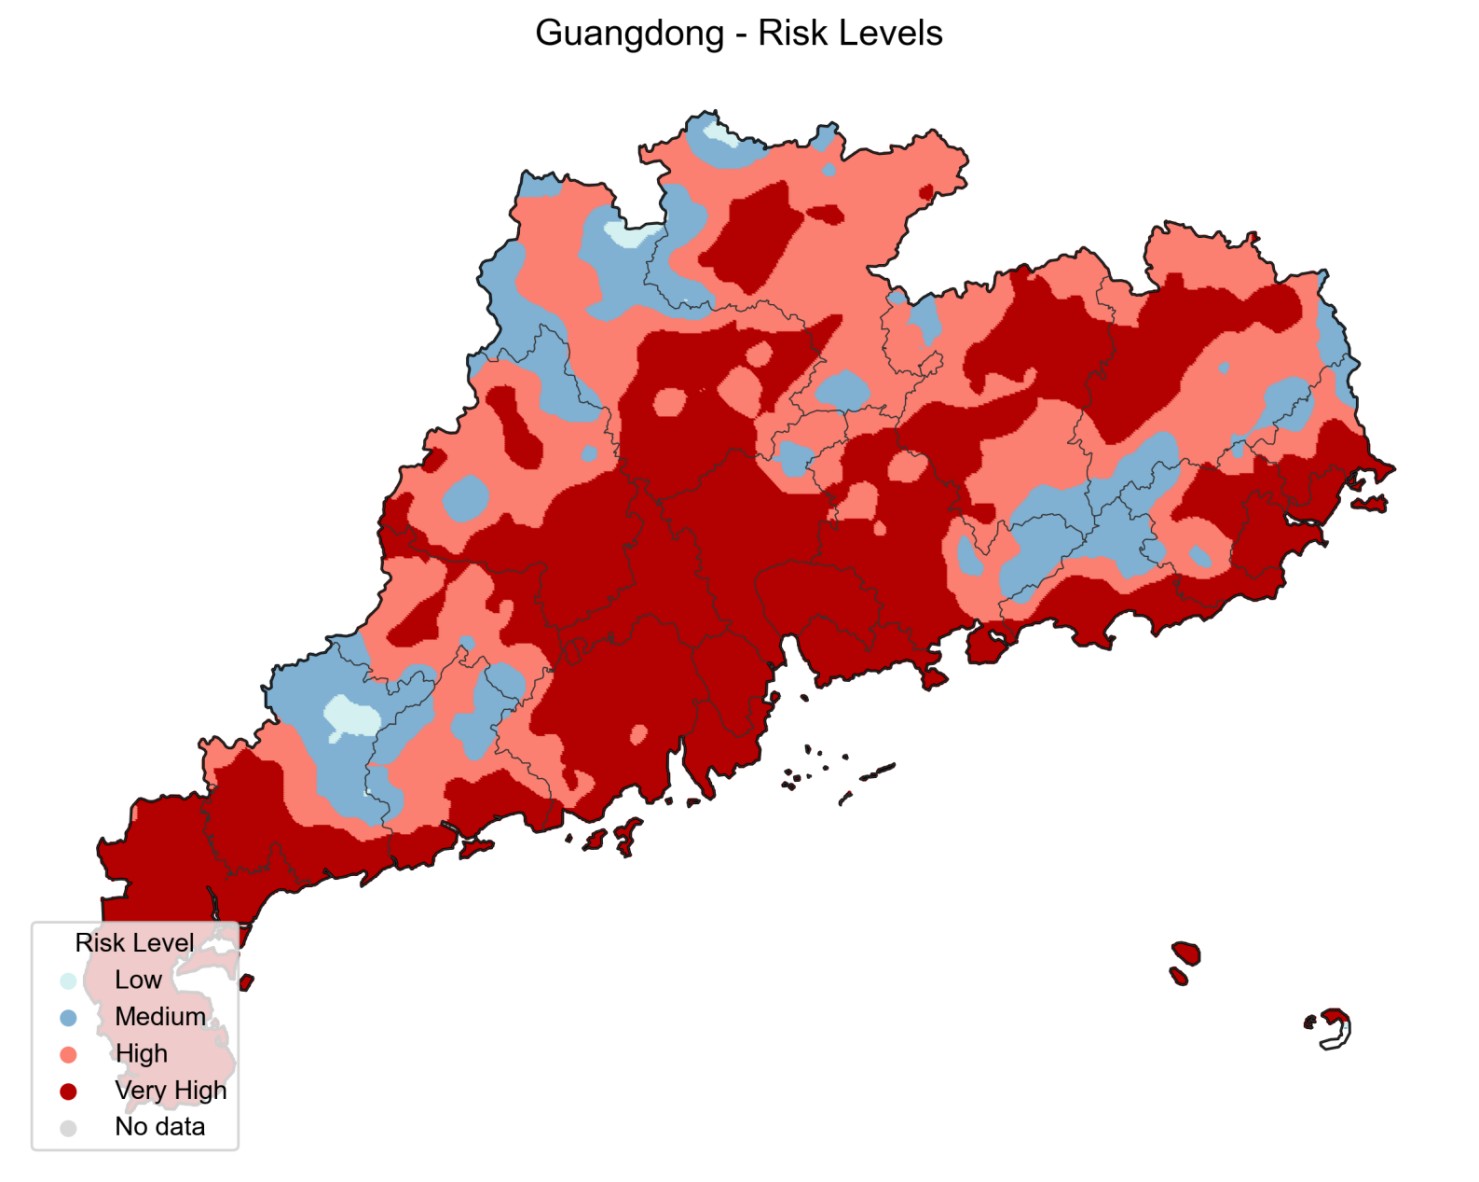


Figure S8. Guangdong


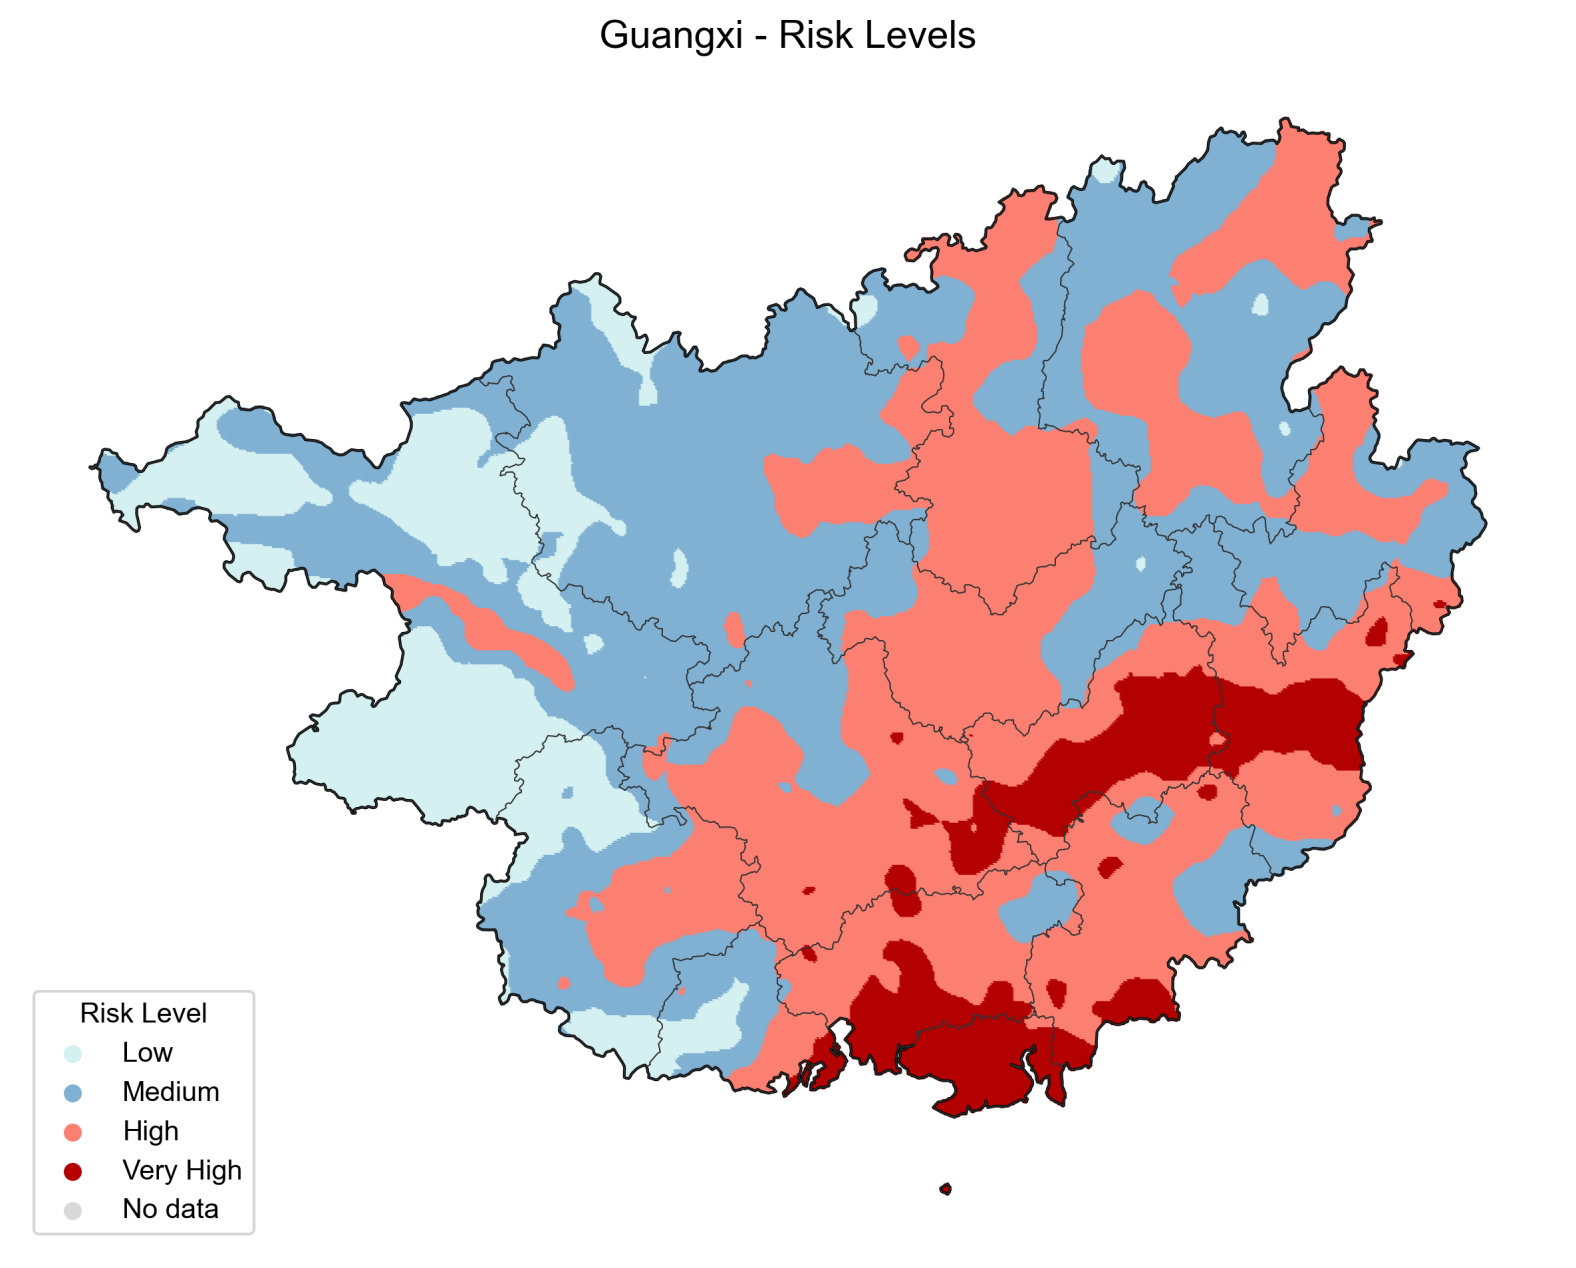


Figure S9. Guangxi


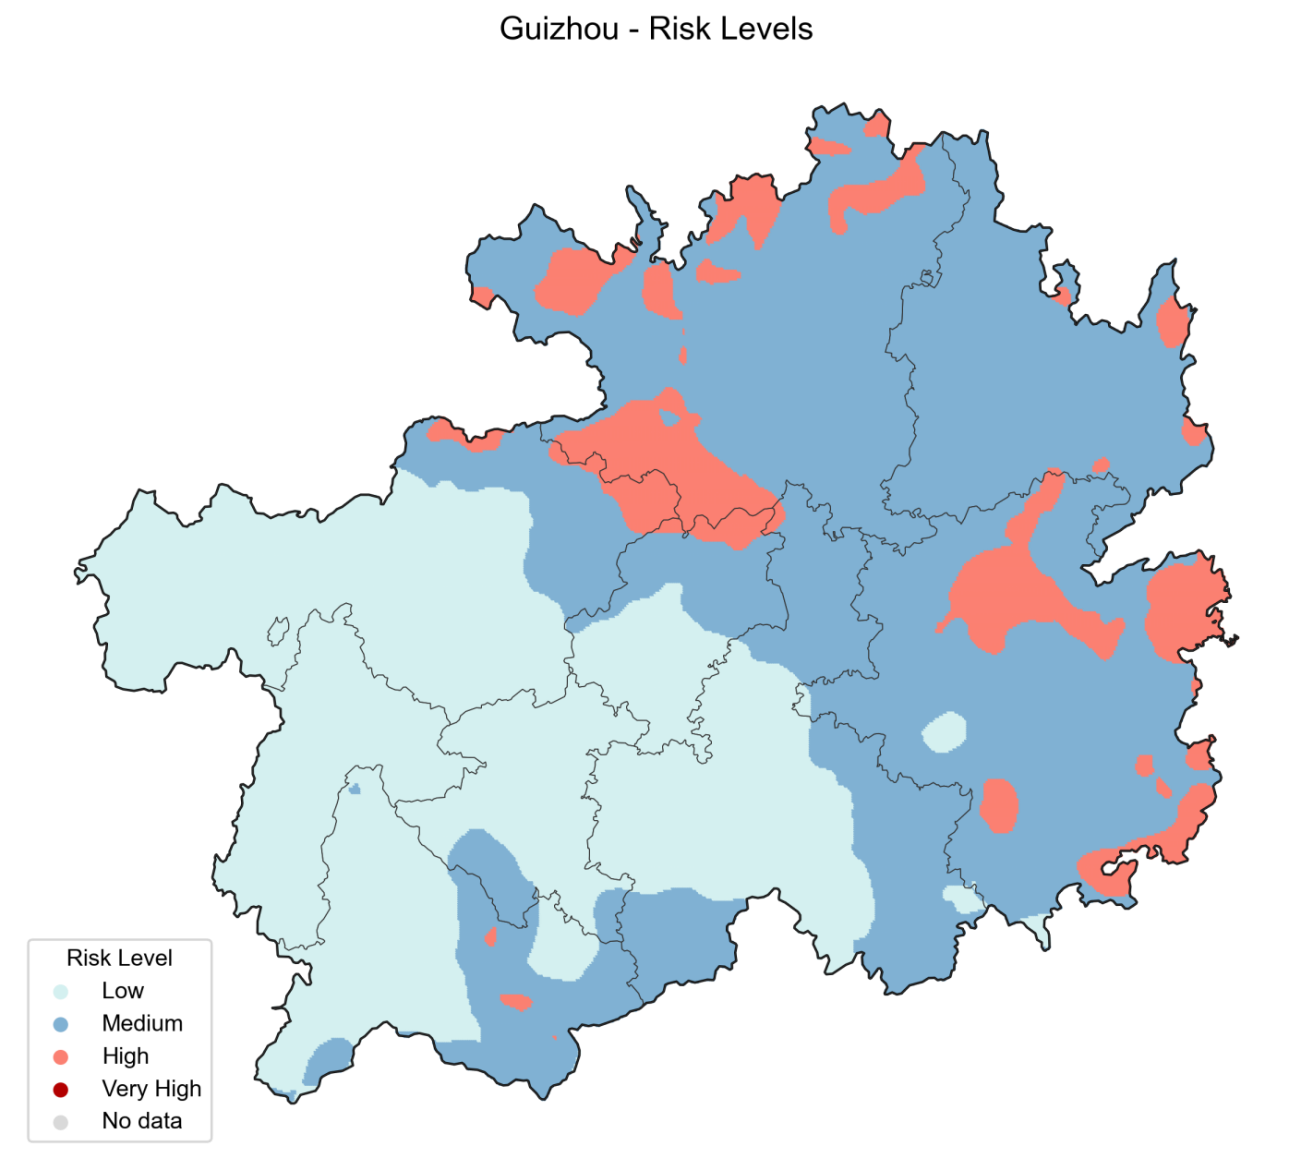


Figure S10. Guizhou


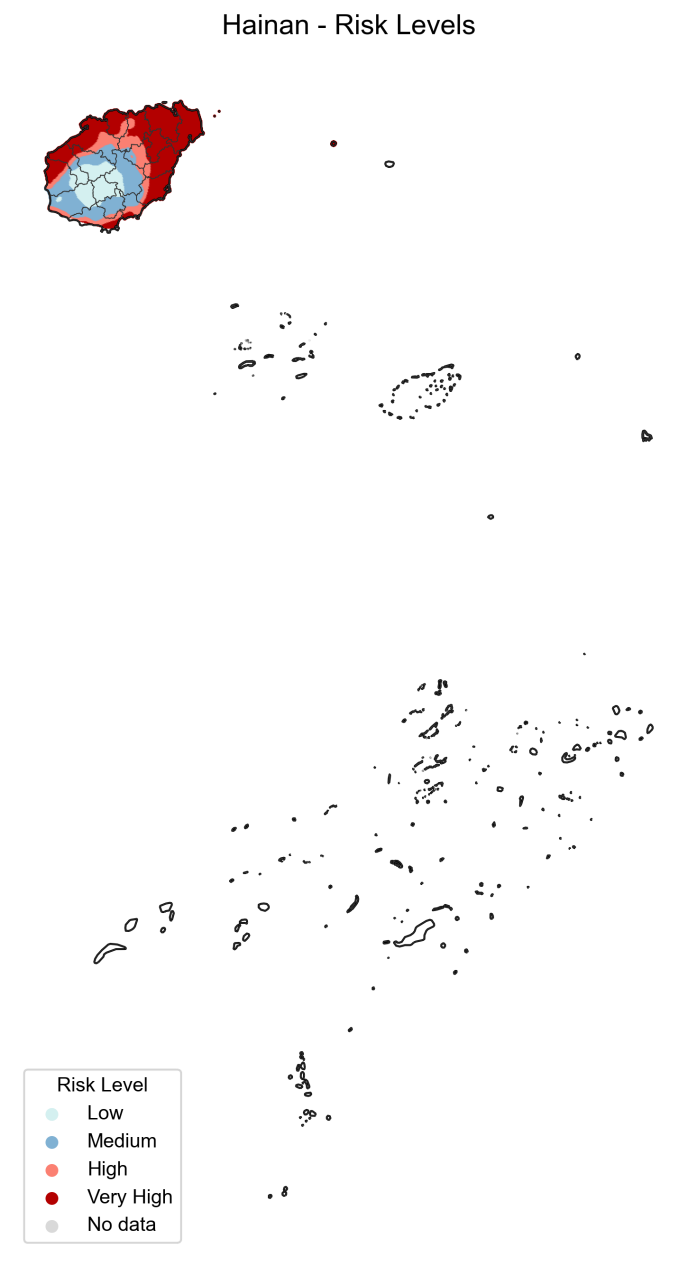


Figure S11.Hainan


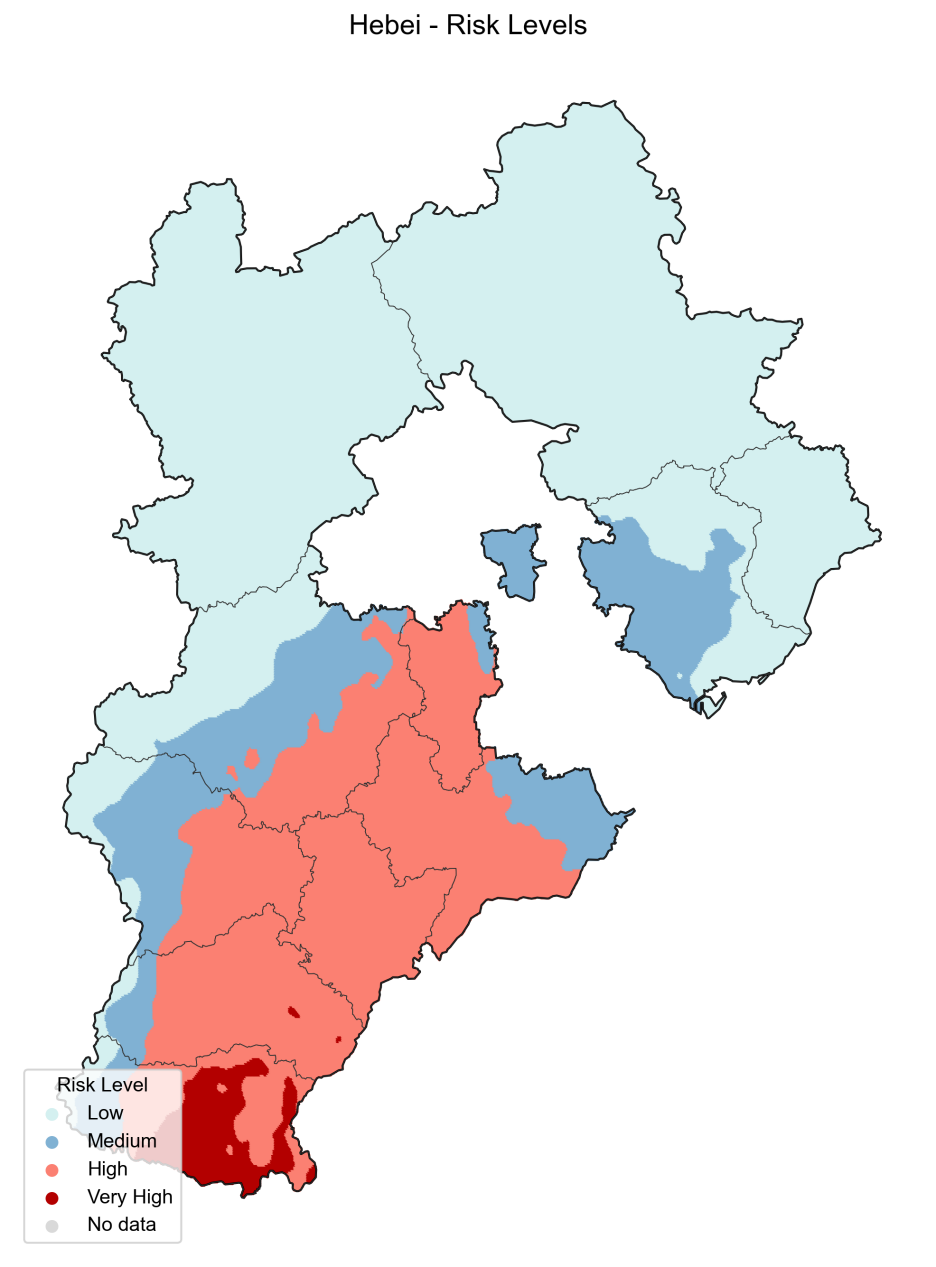


Figure S12. Heibei


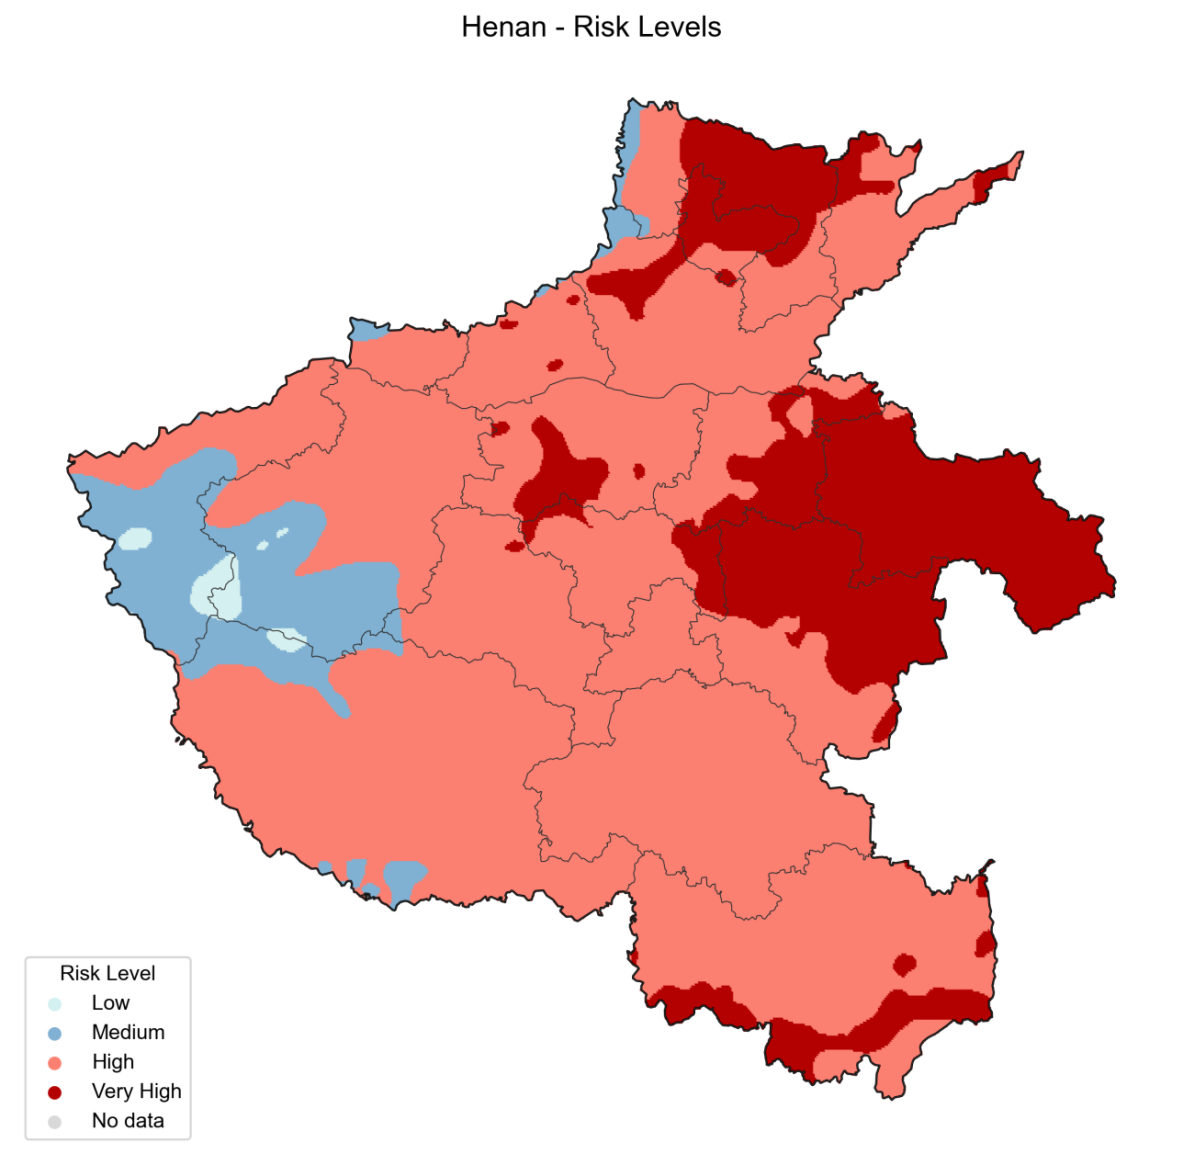


Figure S13. Henan


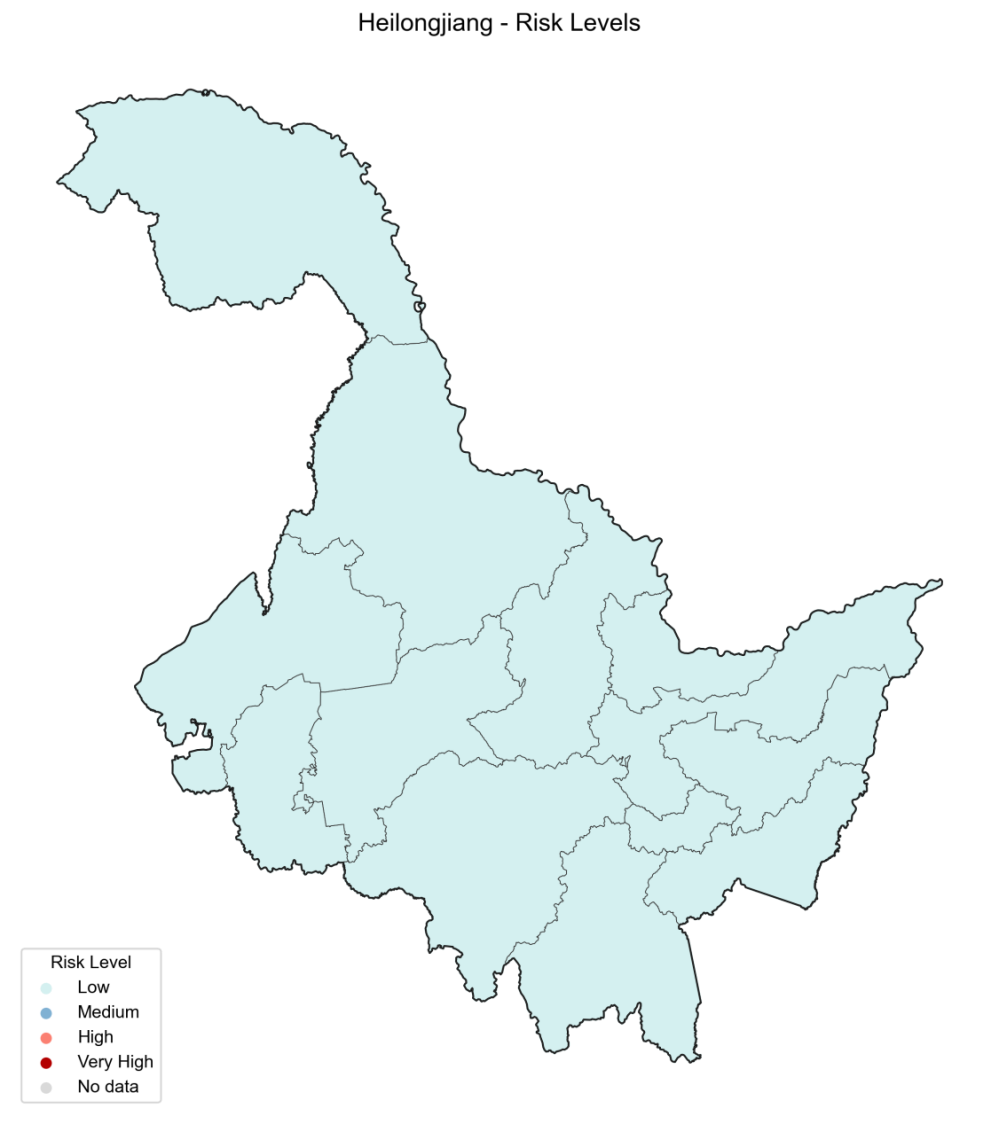


Figure S14. Helongjiang


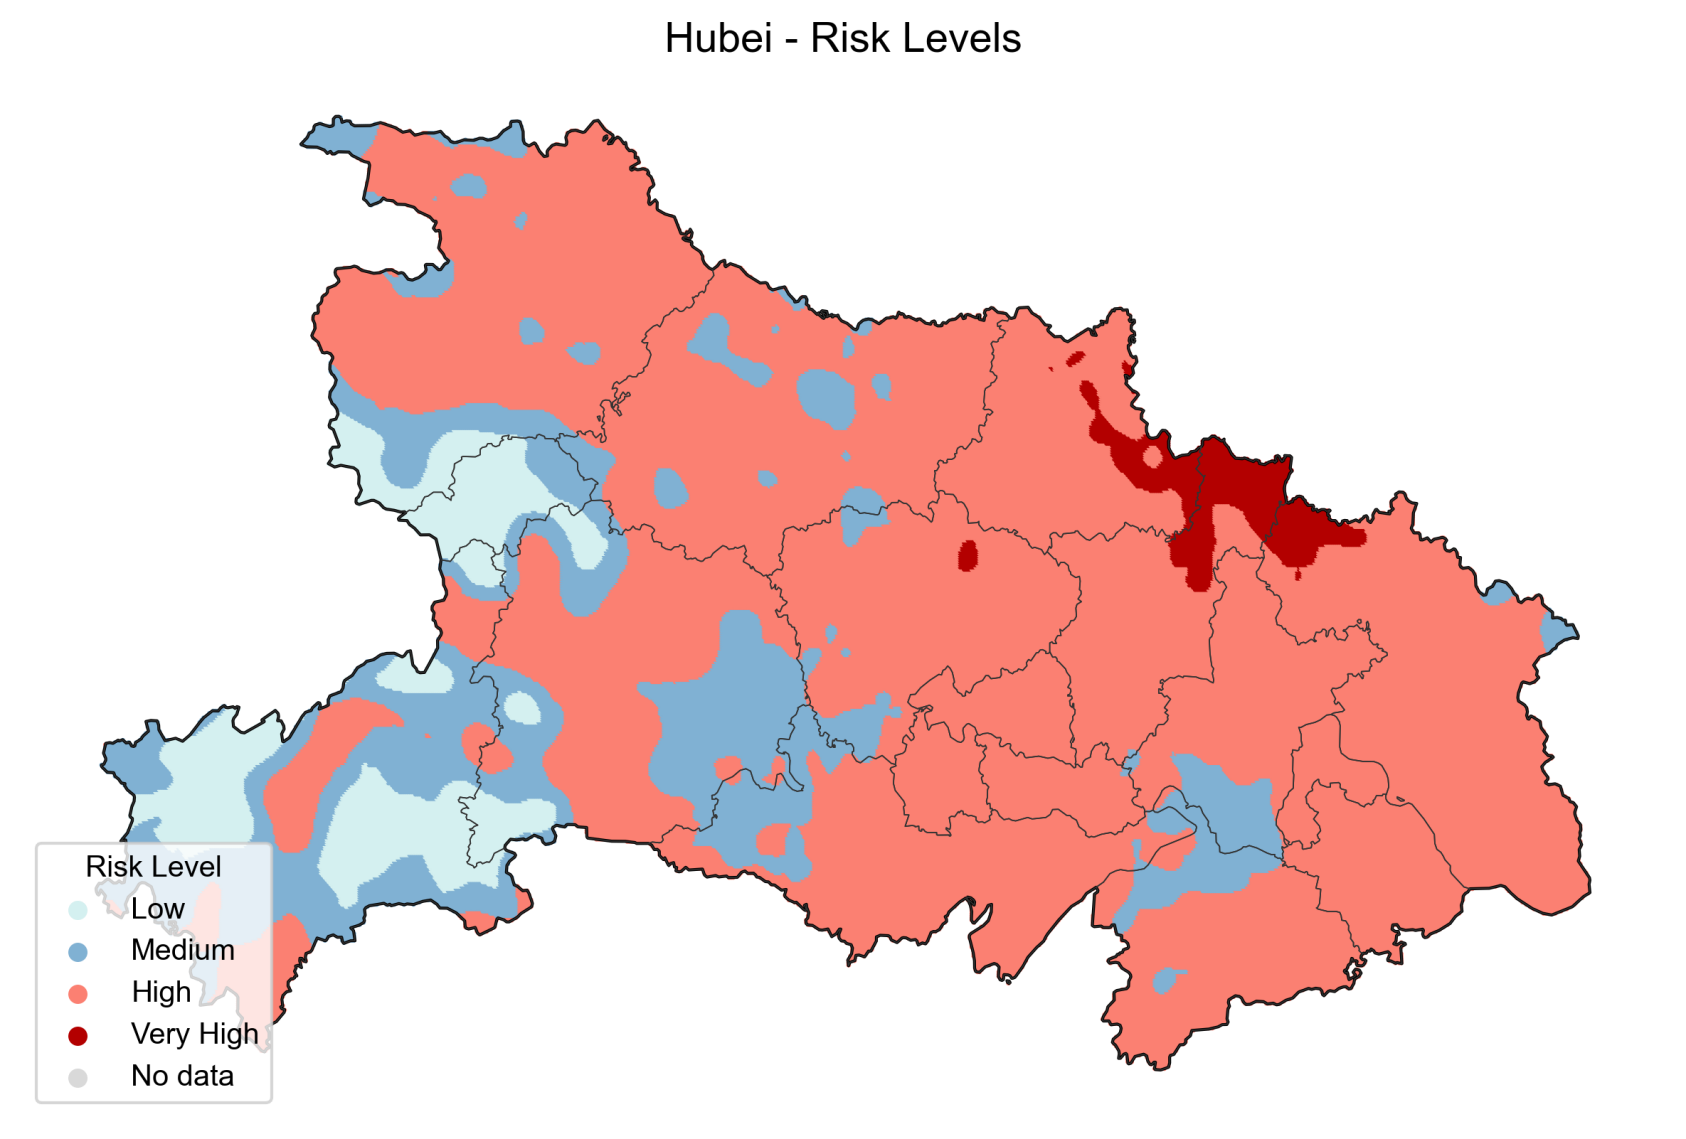


Figure S15. Hubei


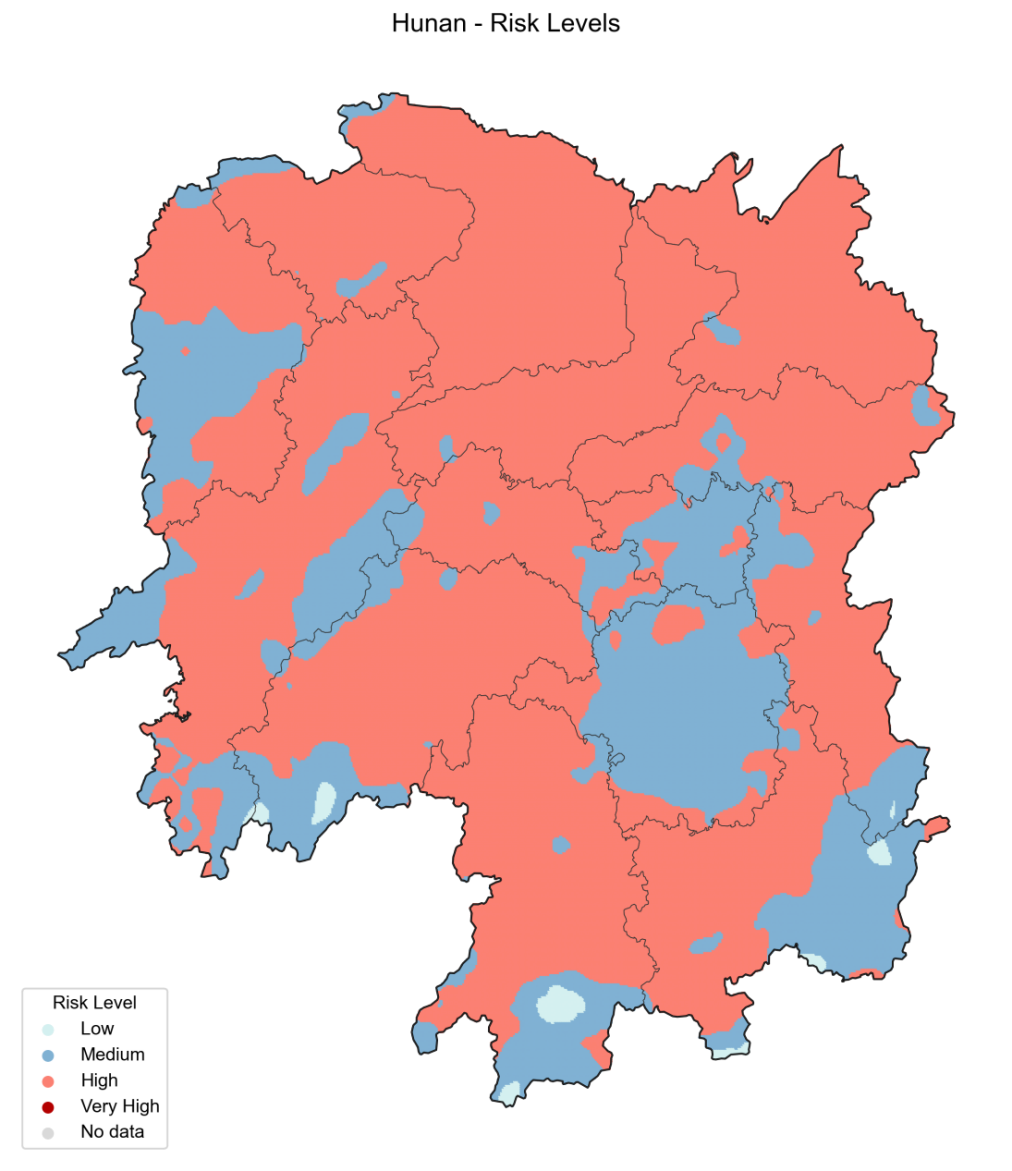


Figure S16. Hunan


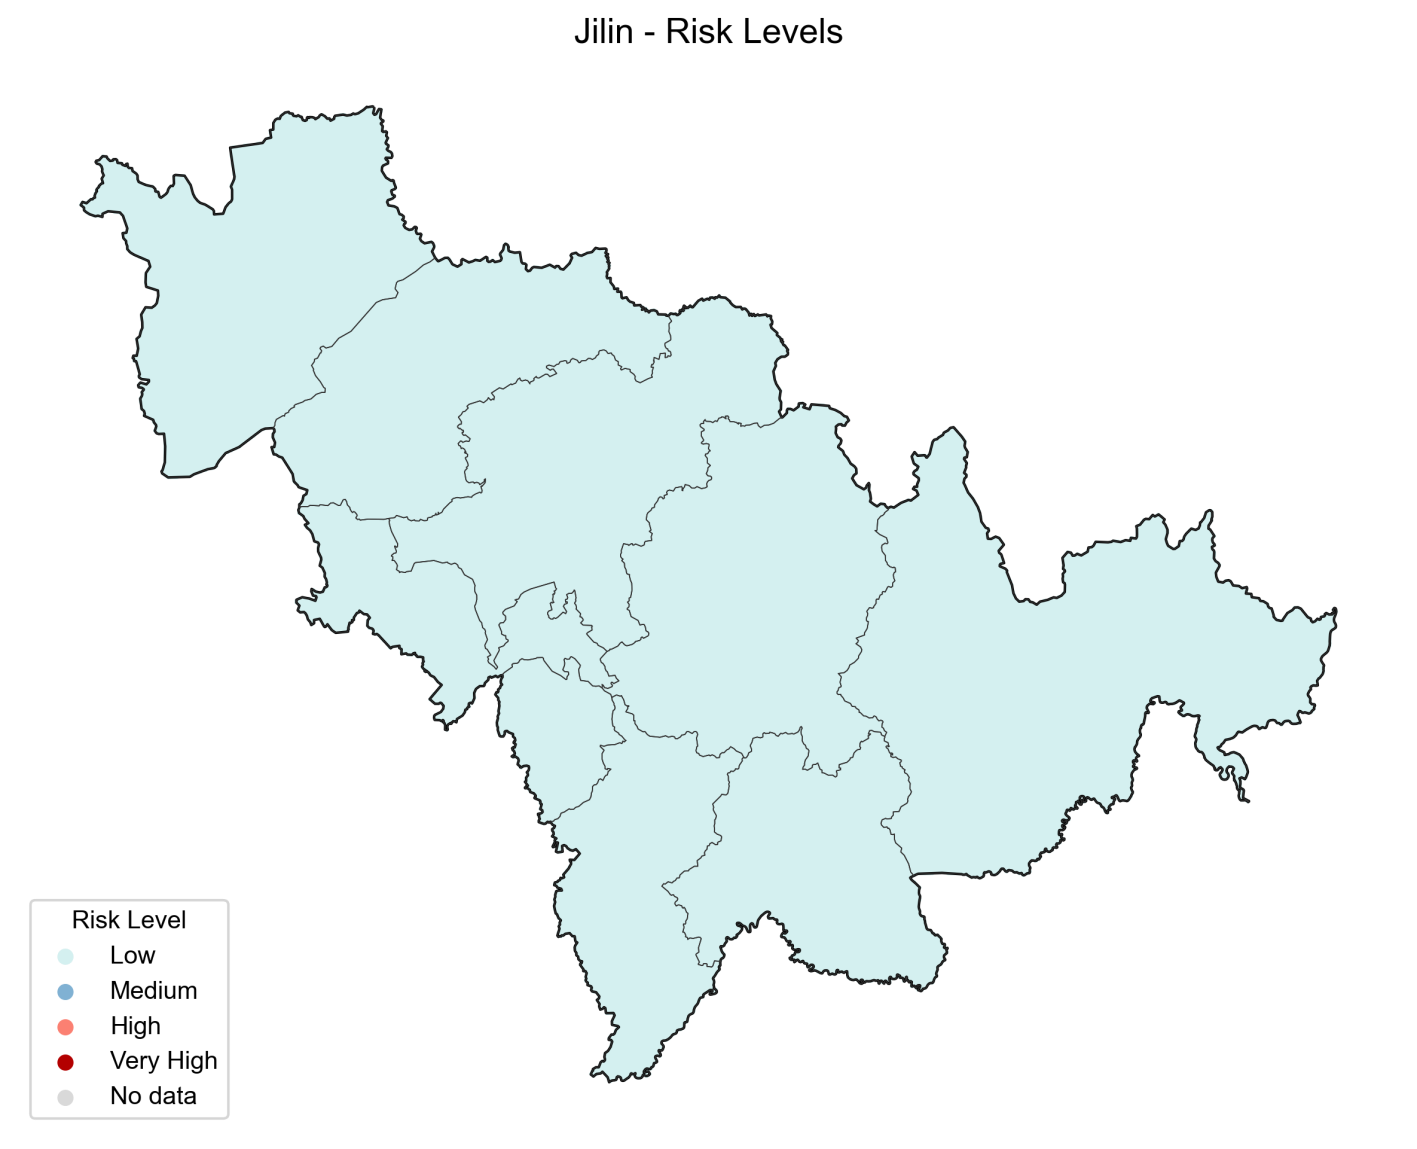


Figure S17. Jilin


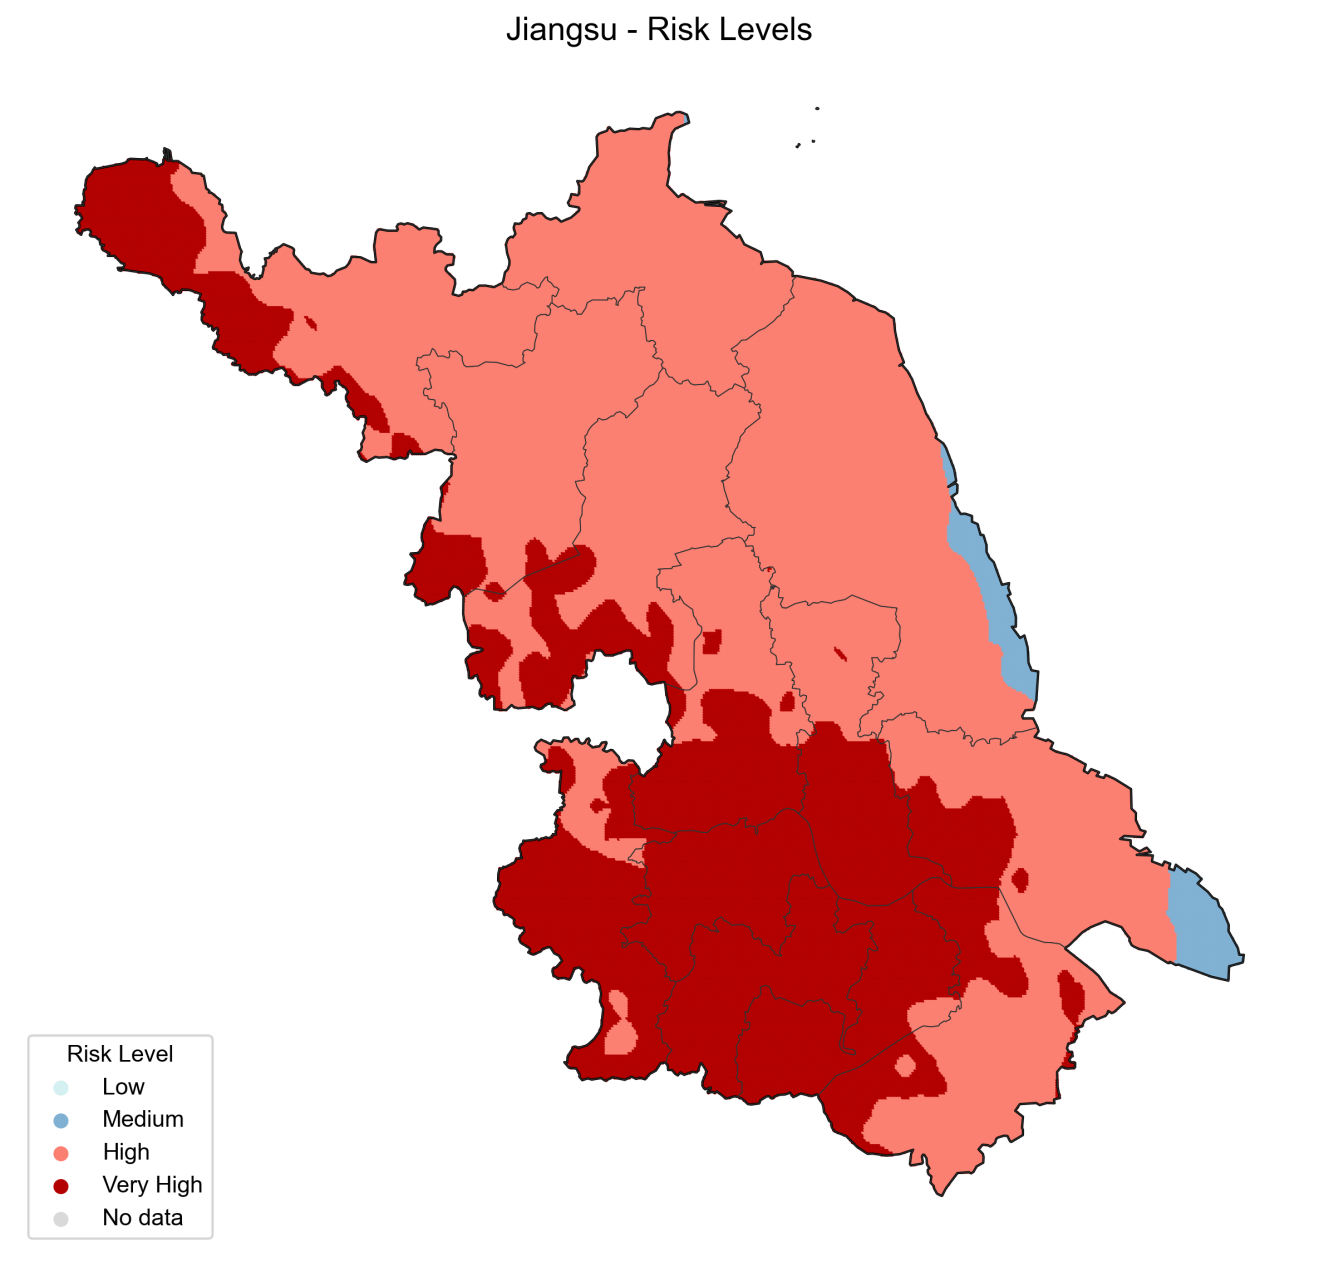


Figure S18. Jiangsu


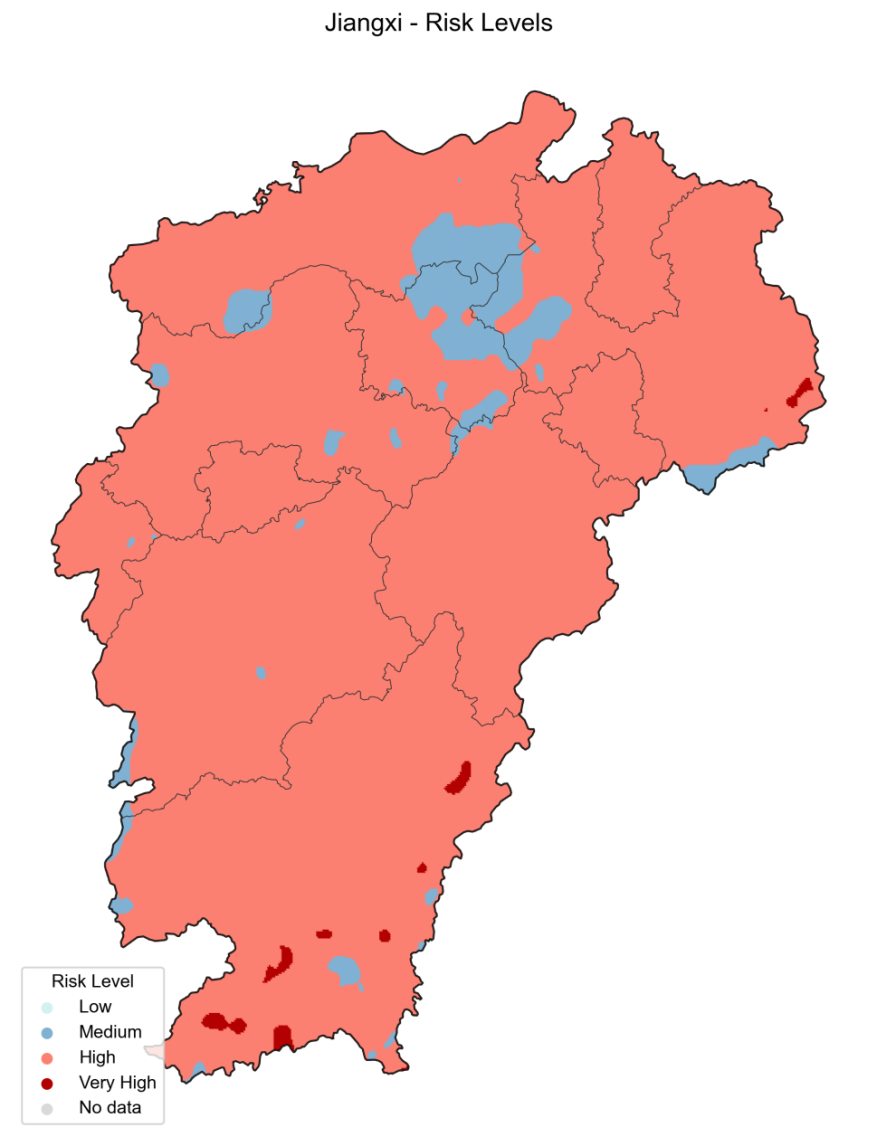


Figure S19. Jiangxi


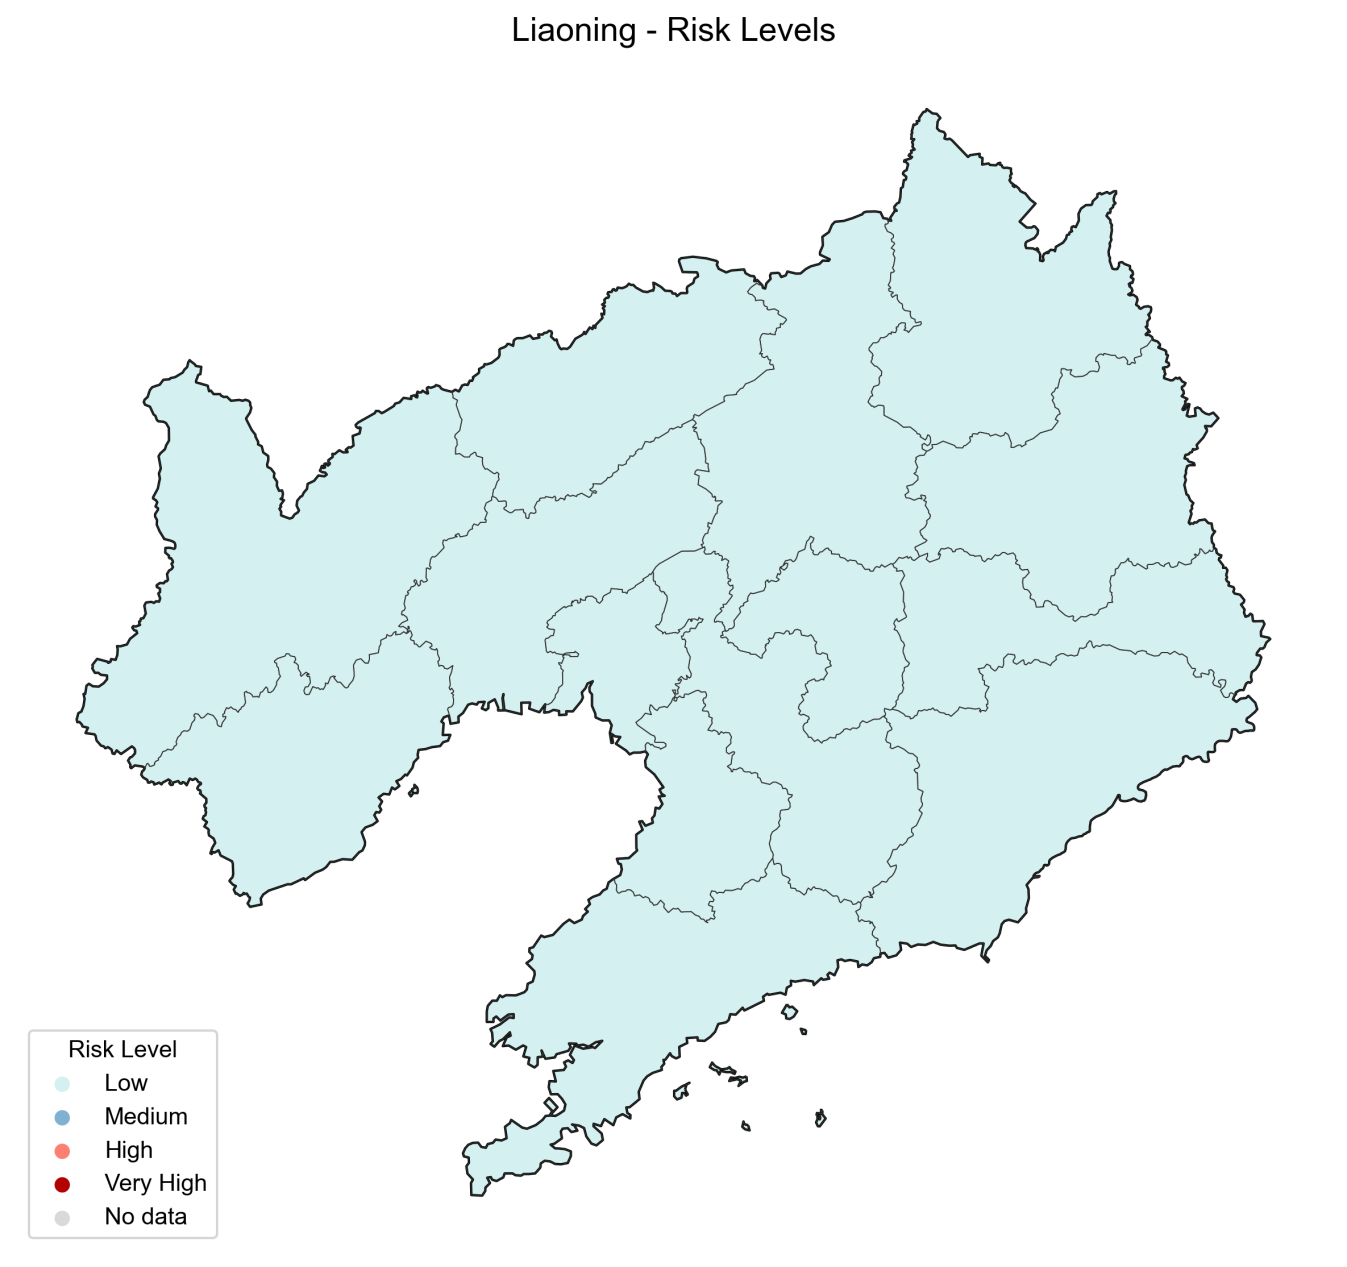


Figure S20. Liaoning


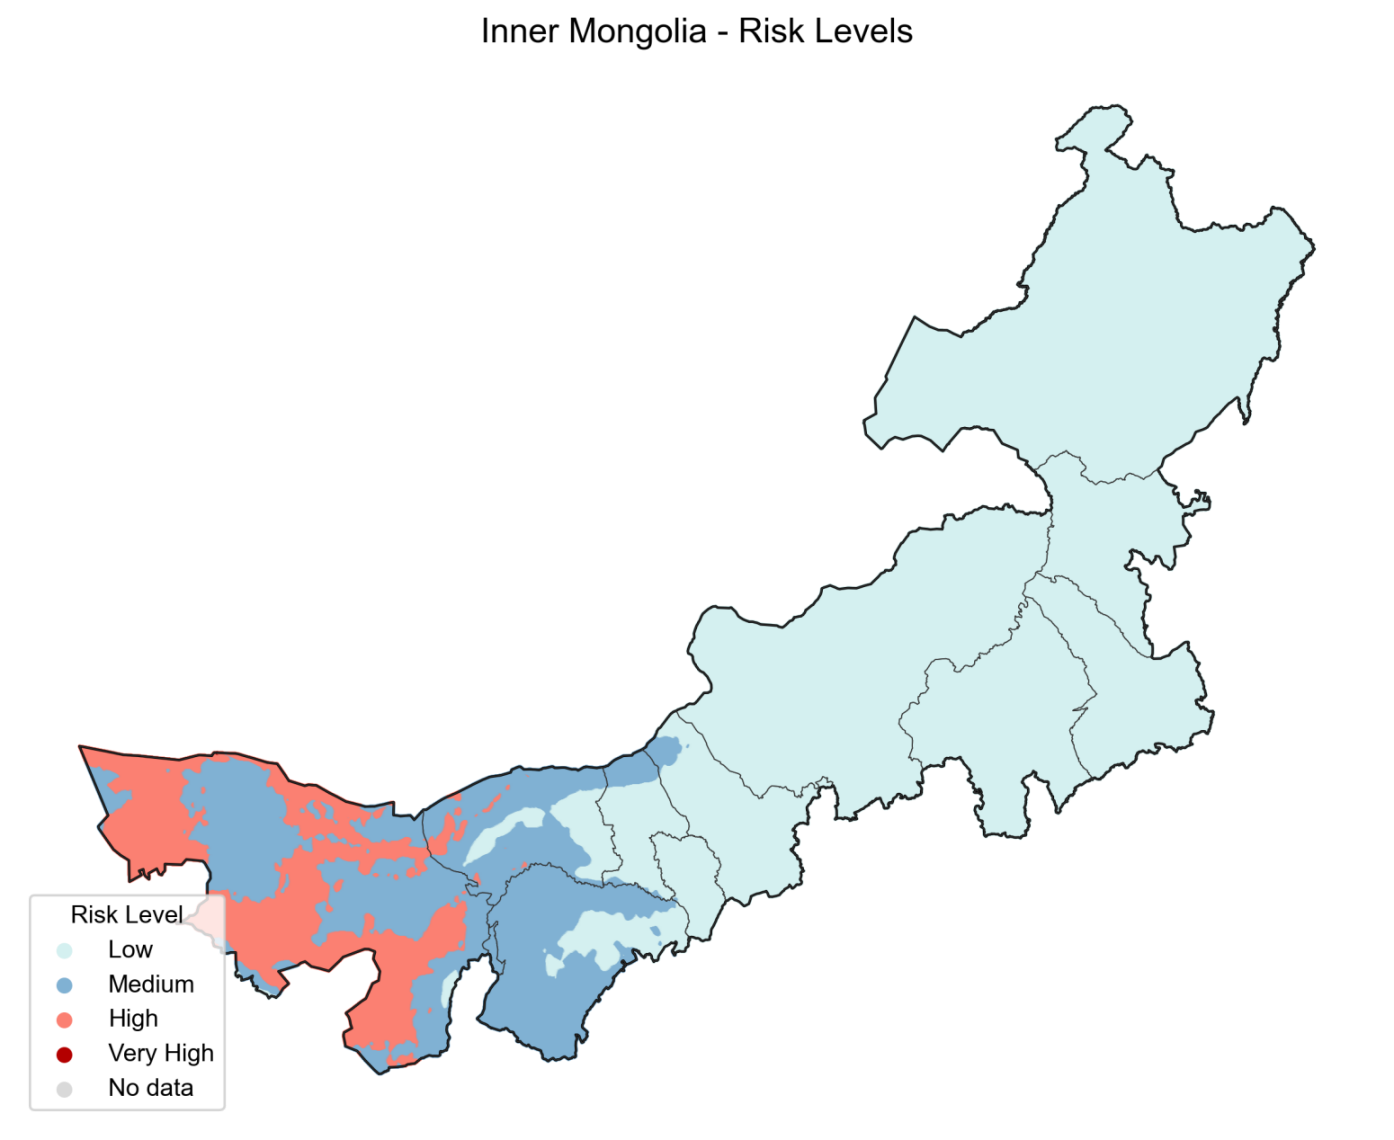


Figure S21. Inner Mongolia


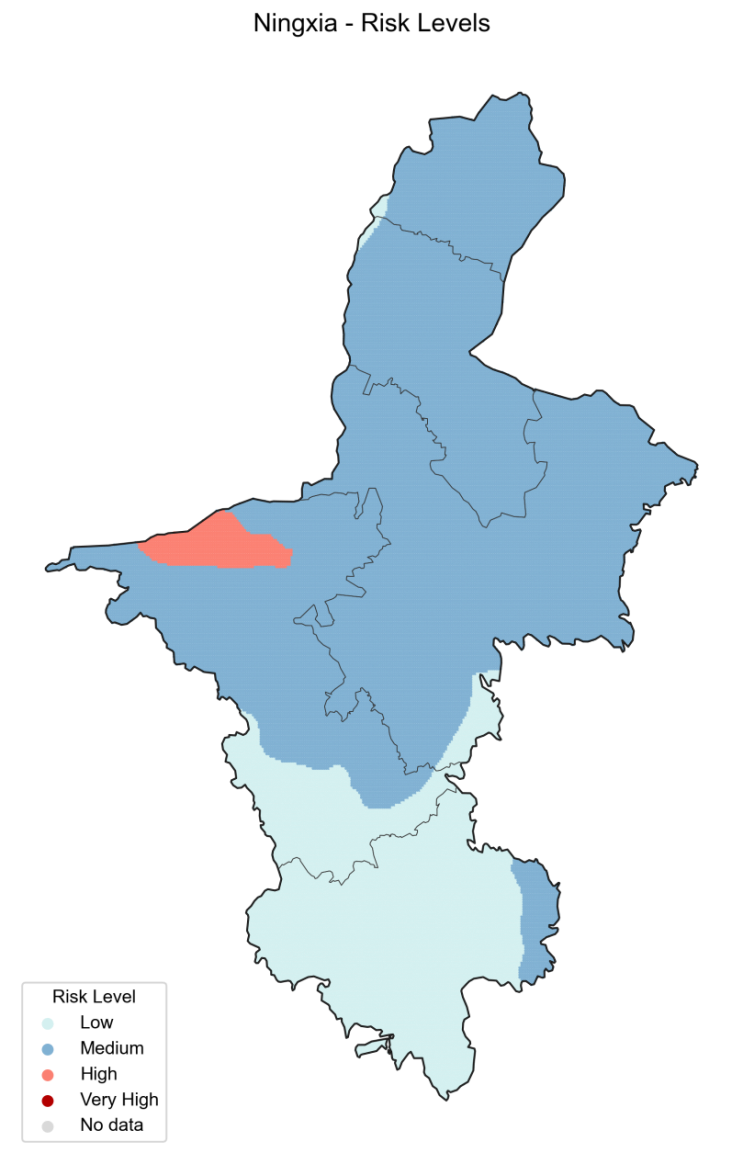


Figure S22. Ningxia


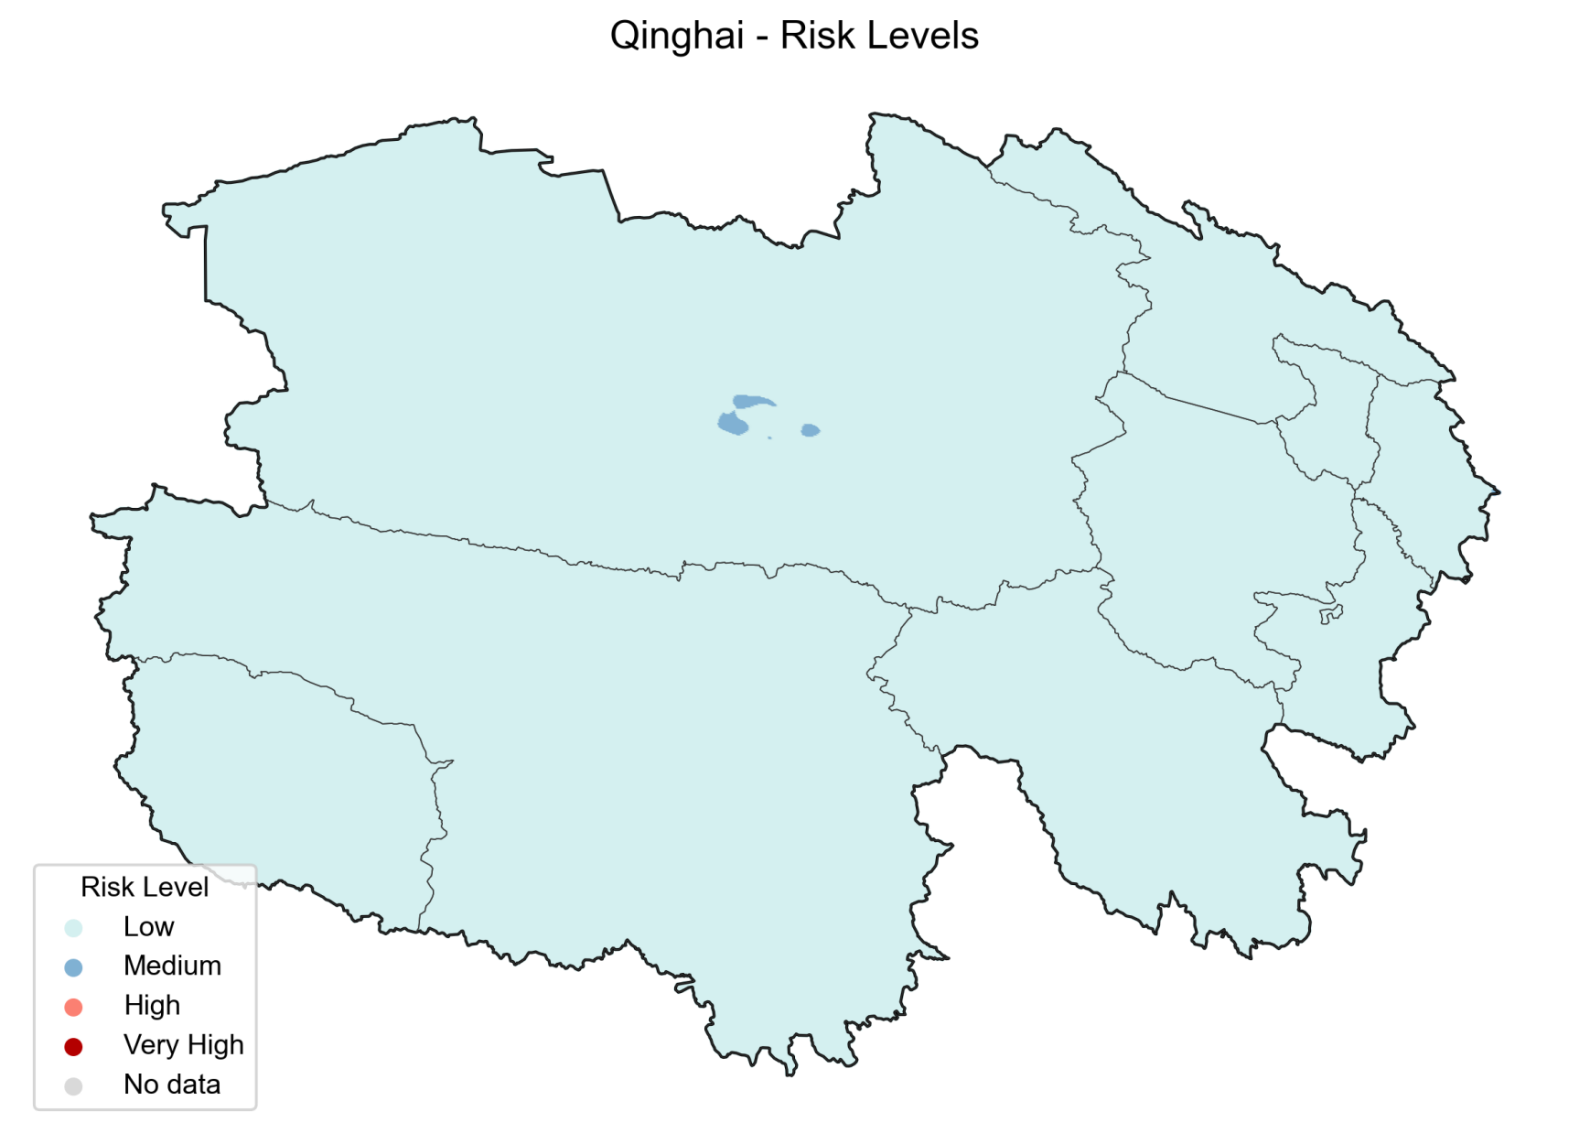


Figure S23. Qinghai


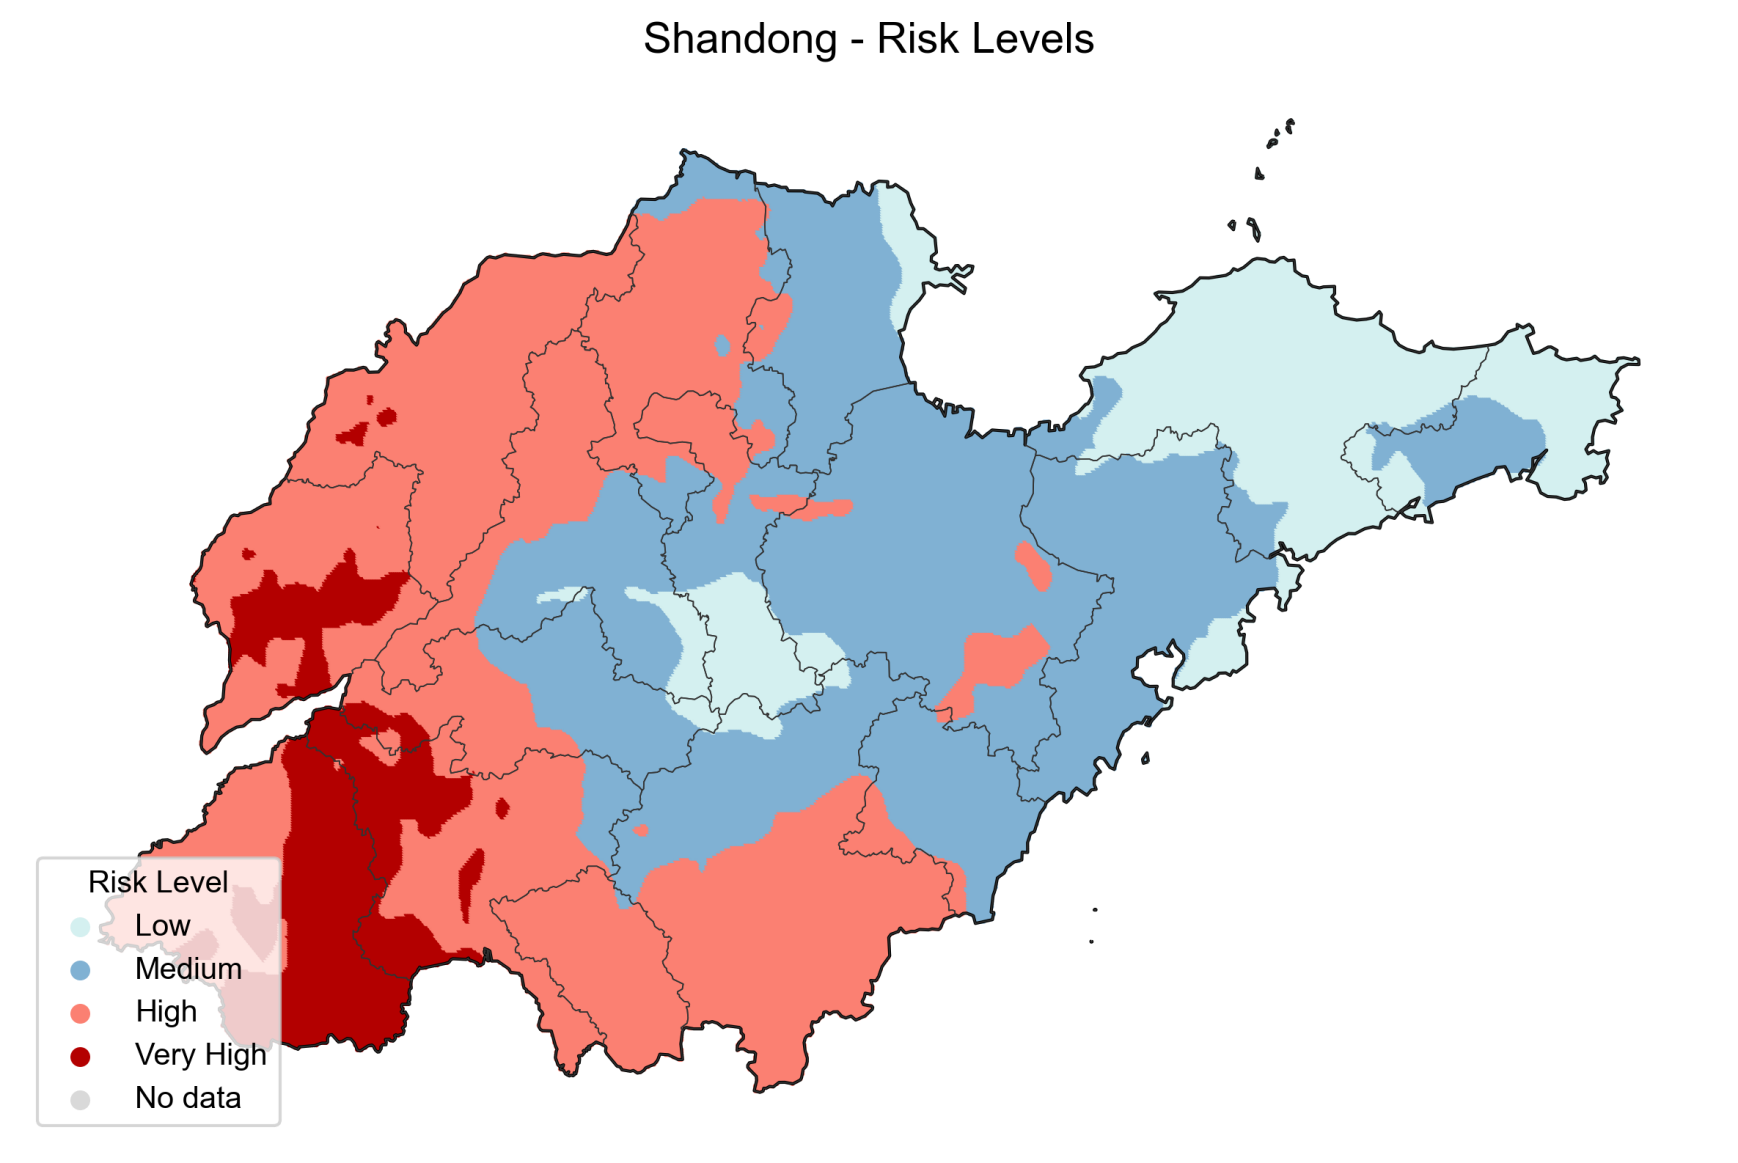


Figure S24. Shandong


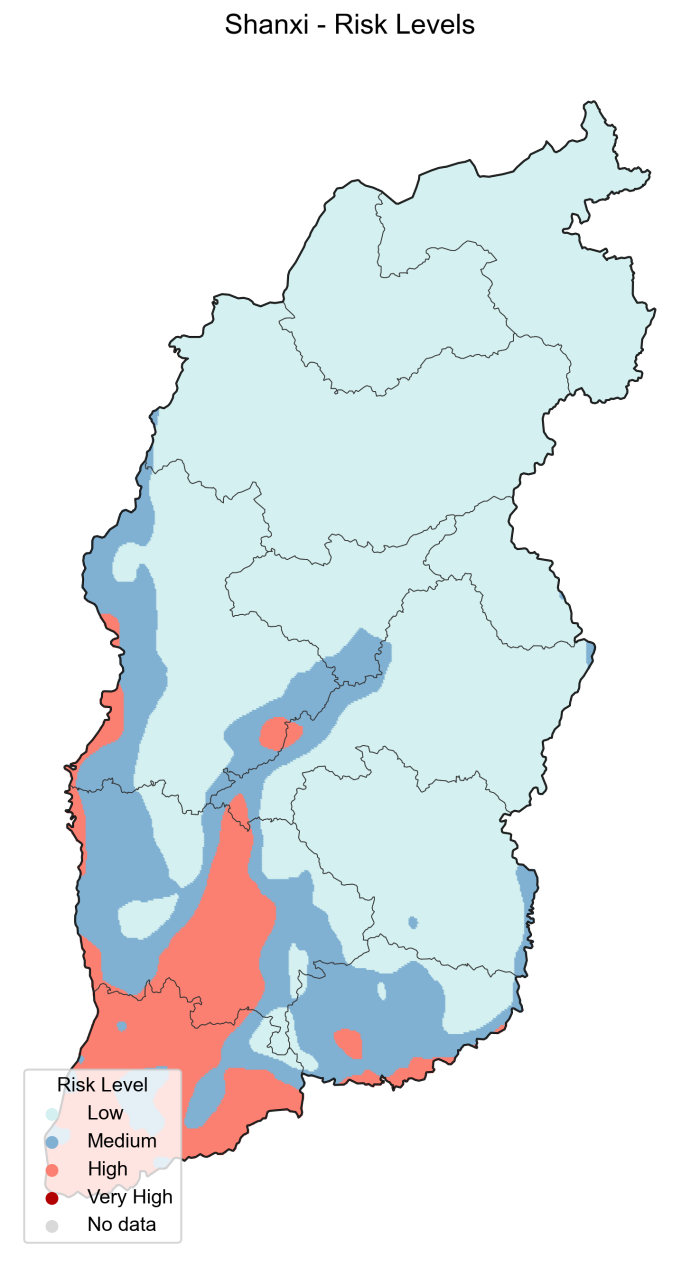


Figure S25. Shanxi


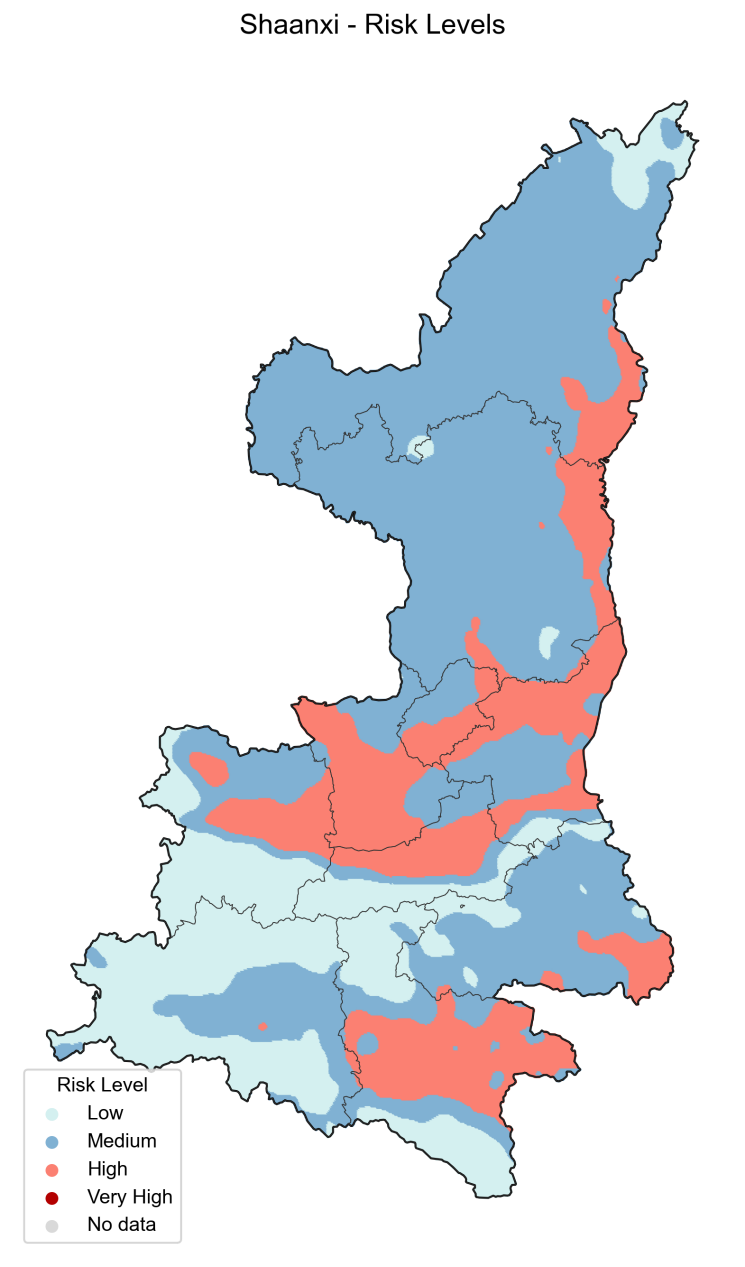


Figure S26. Shannxi


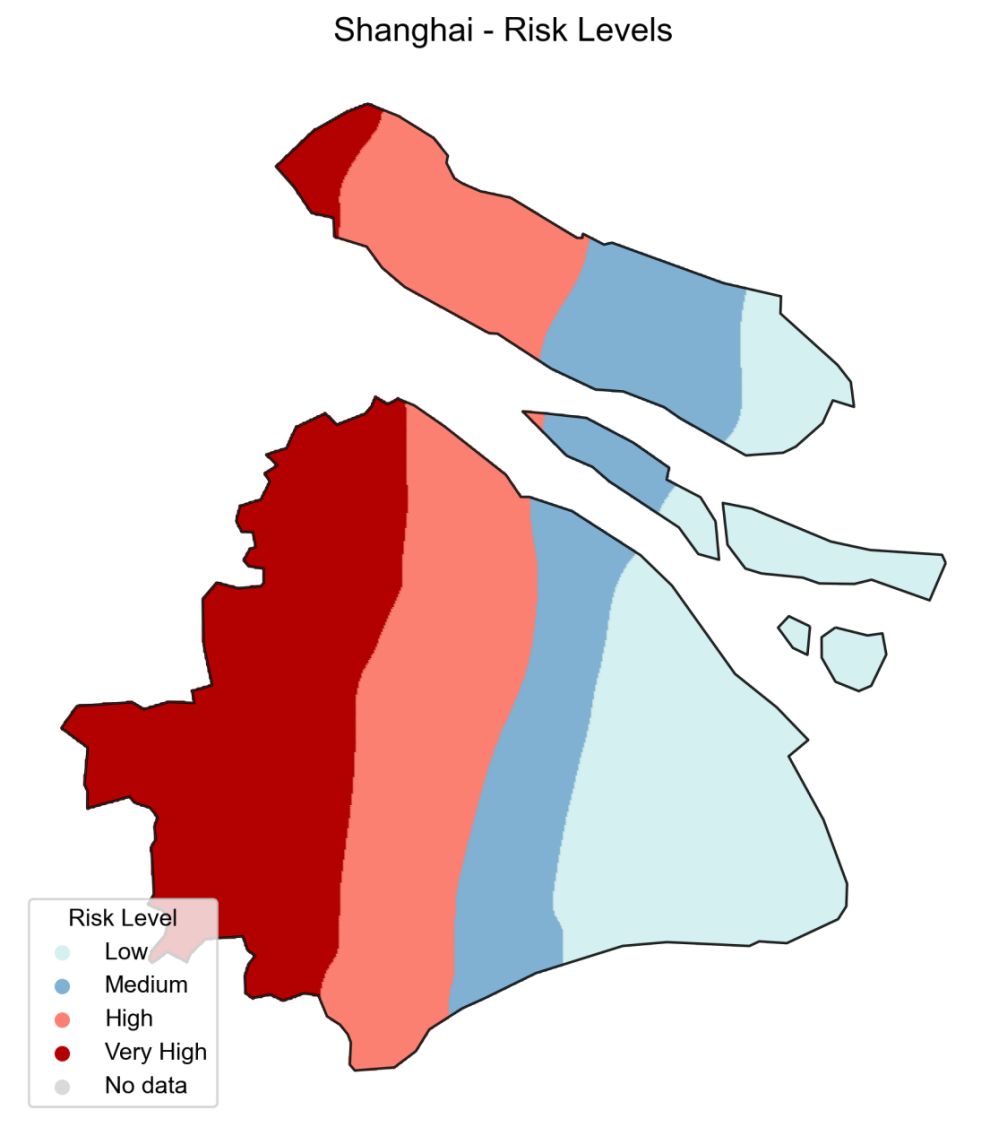


Figure S27. Shanghai


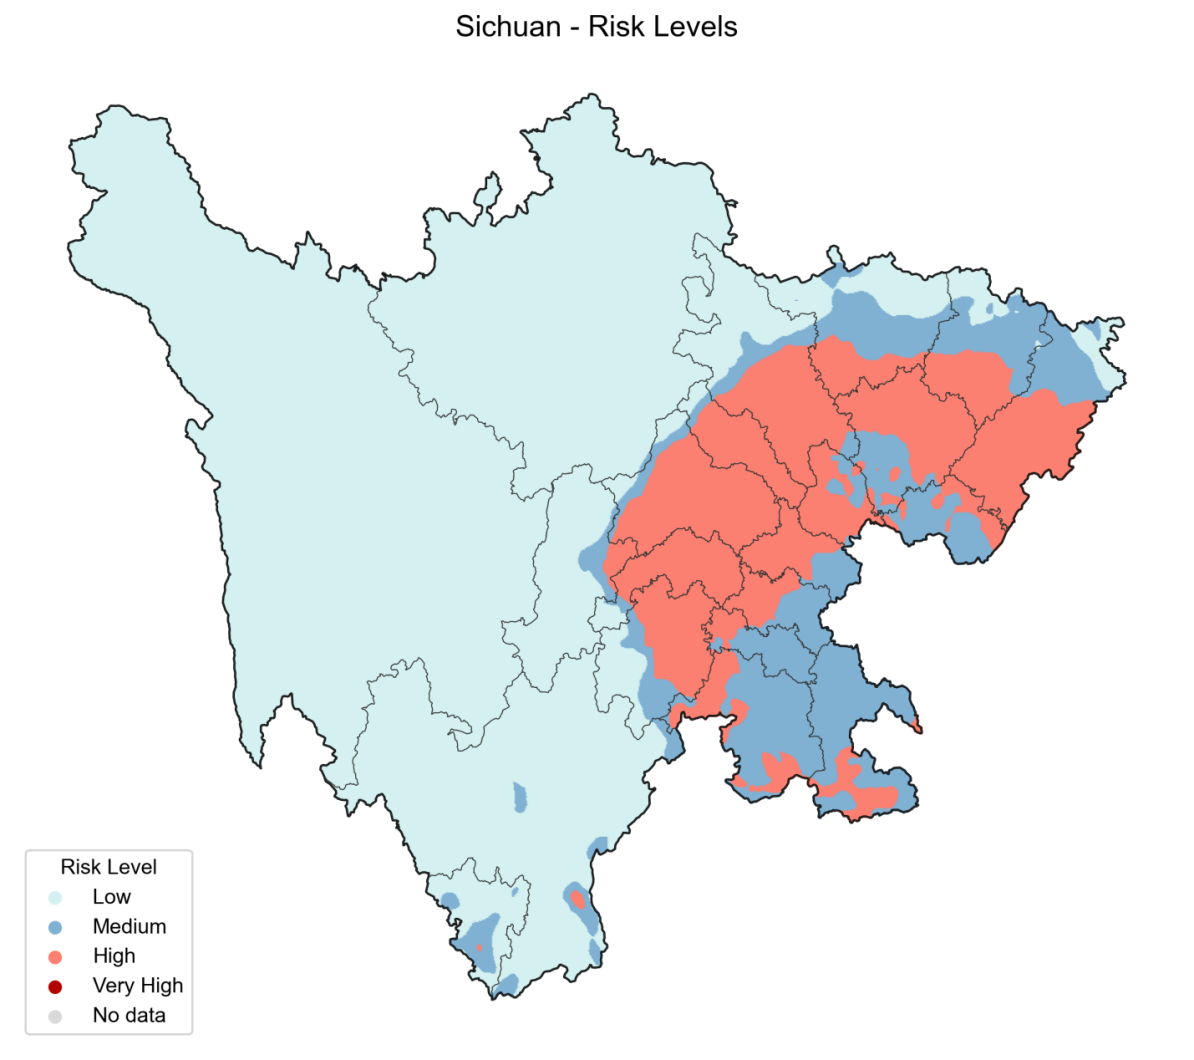


Figure S28. Sichuan


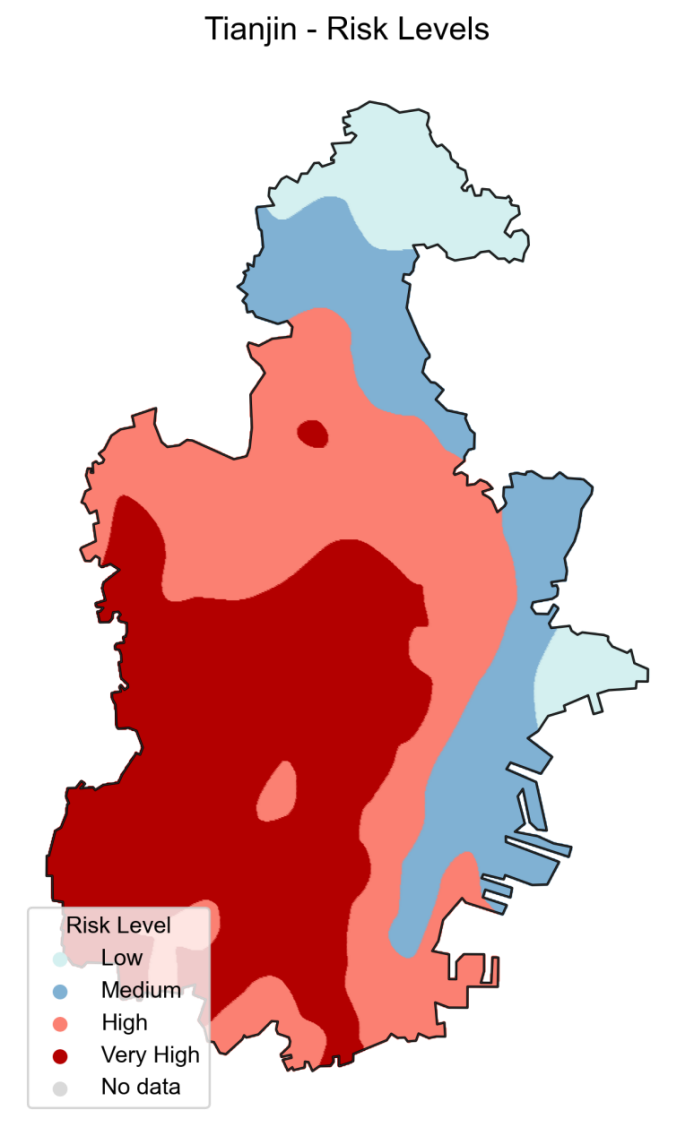


Figure S29. Tianjin


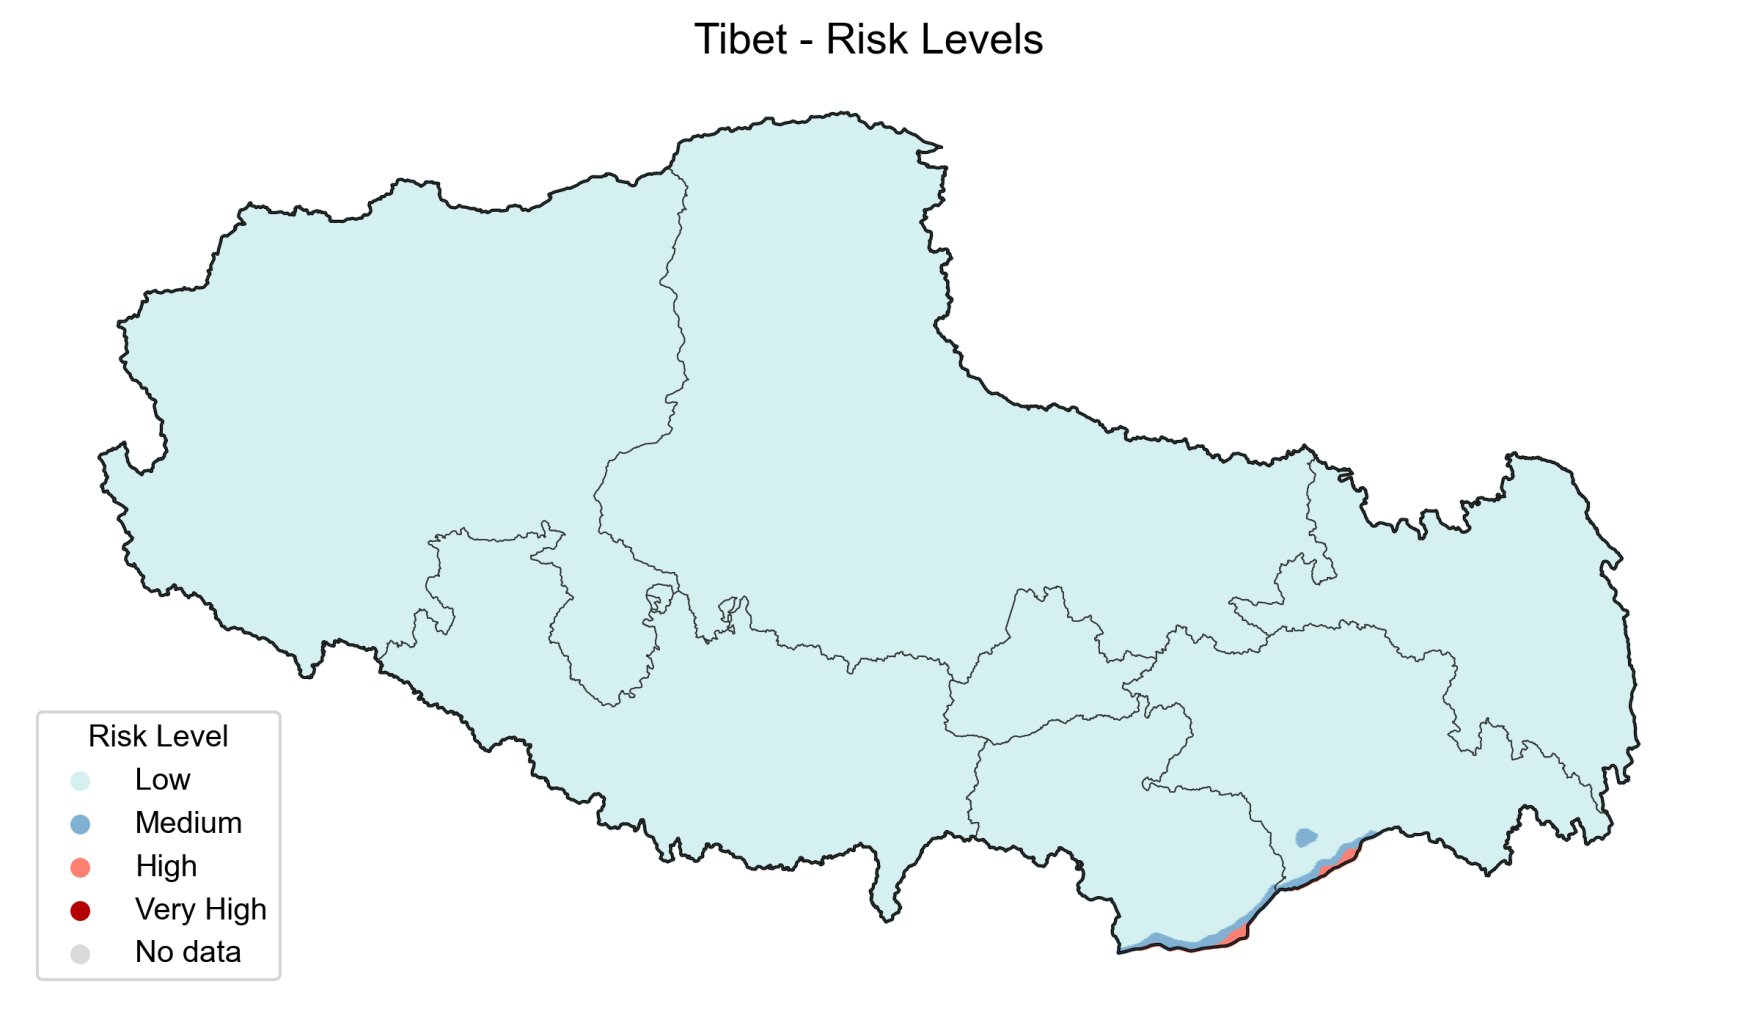


Figure S30. Tibet (Xizang)


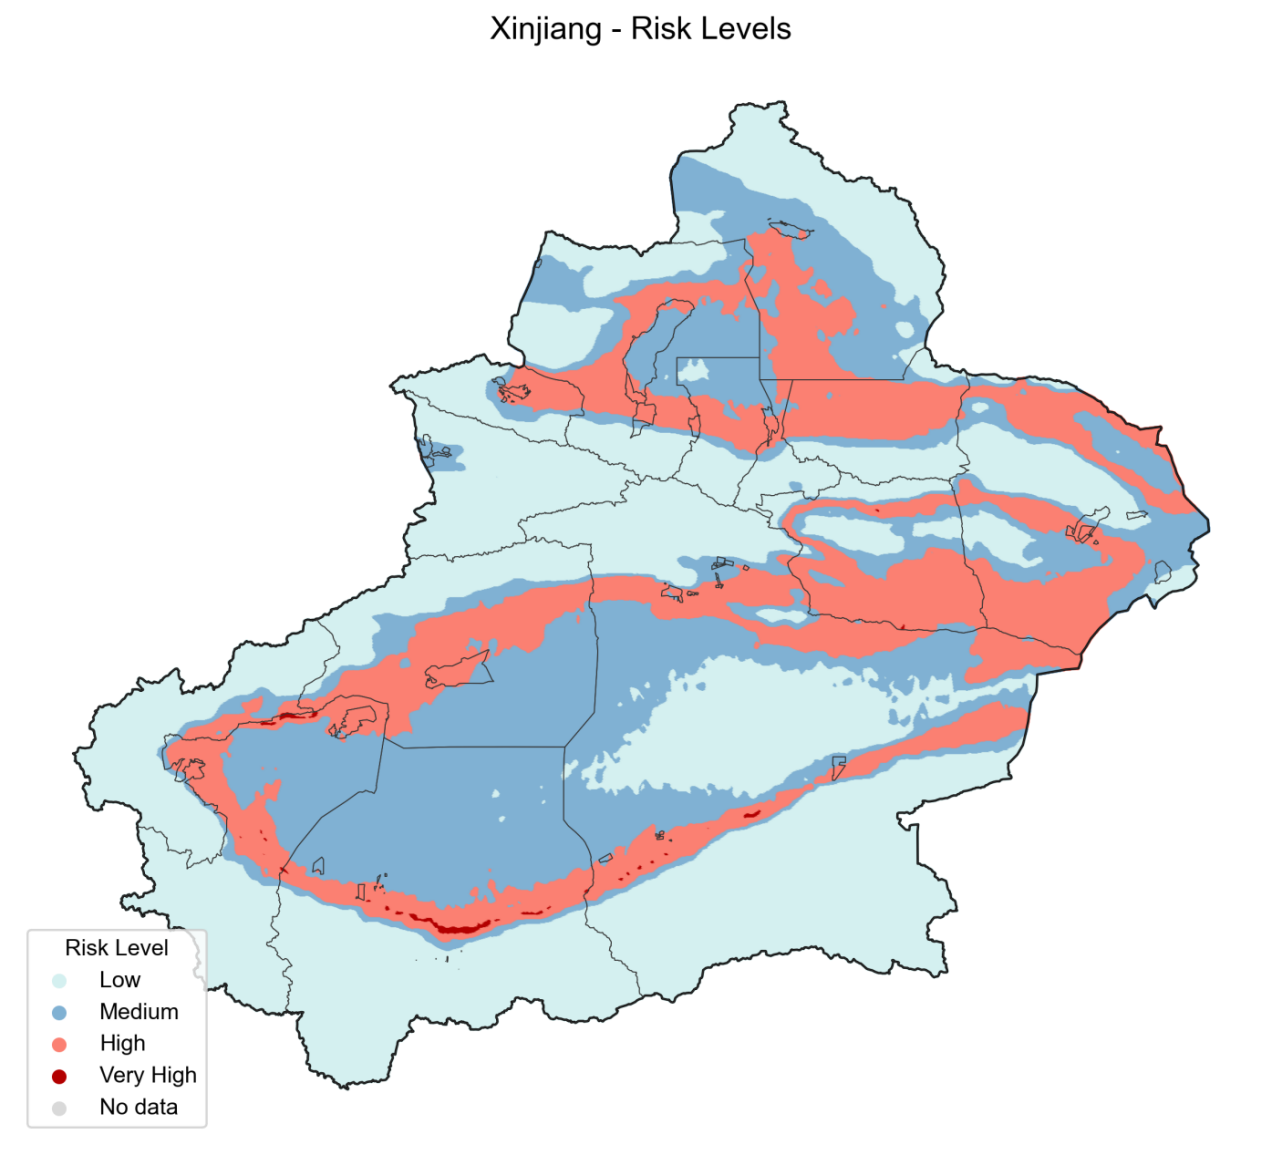


Figure S31. Xinjang


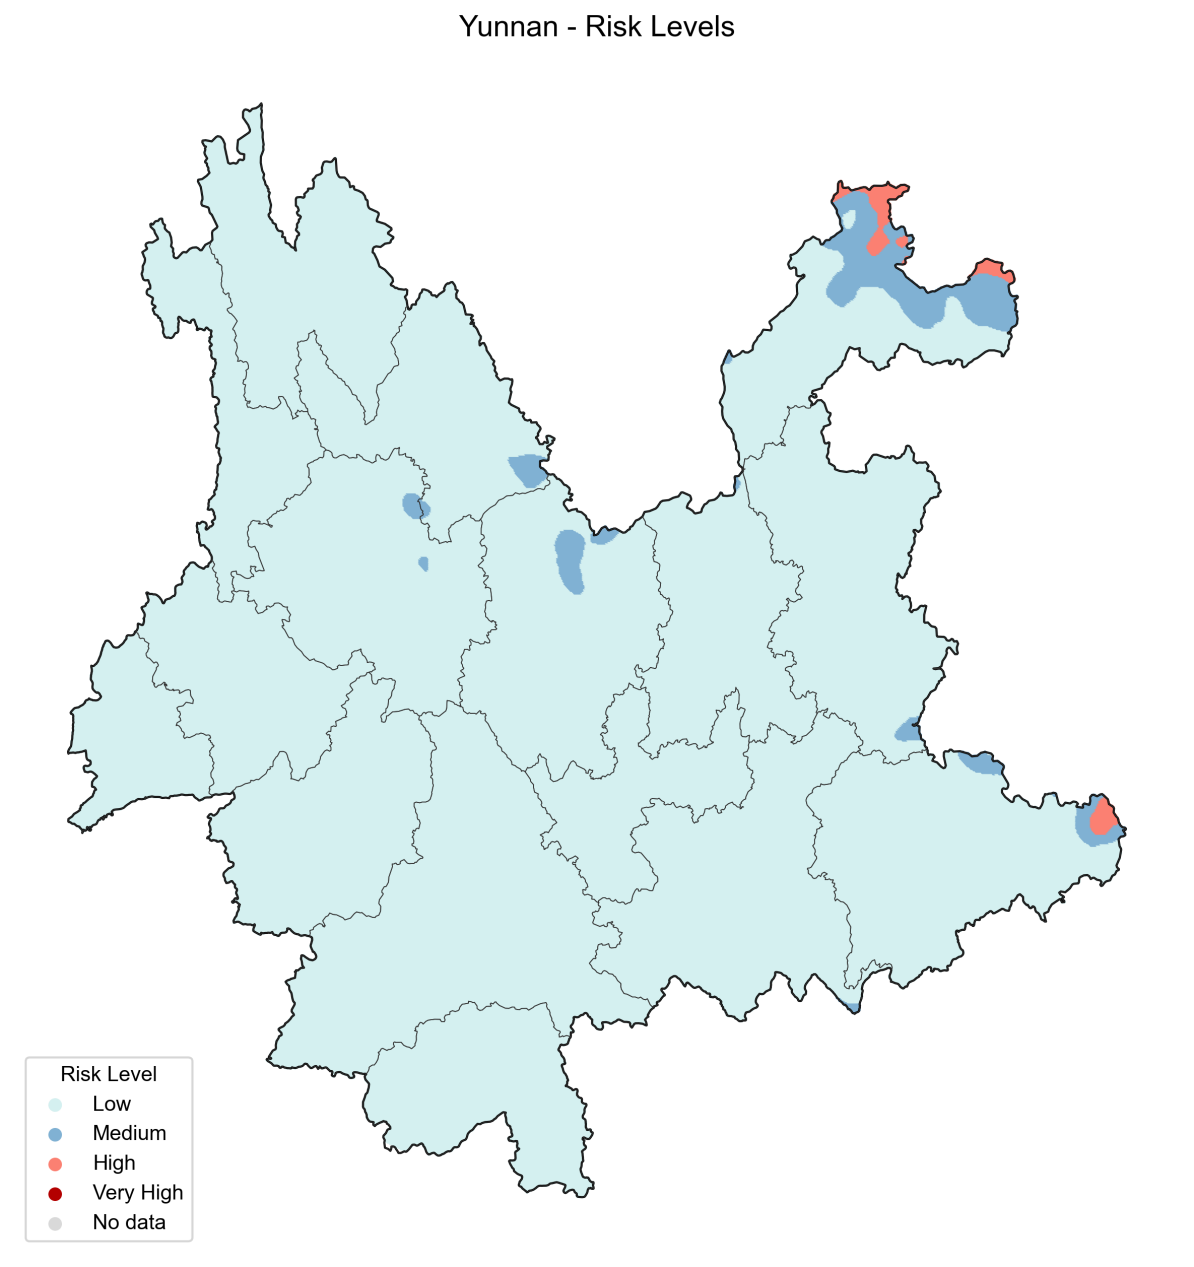


Figure S32. Yunan


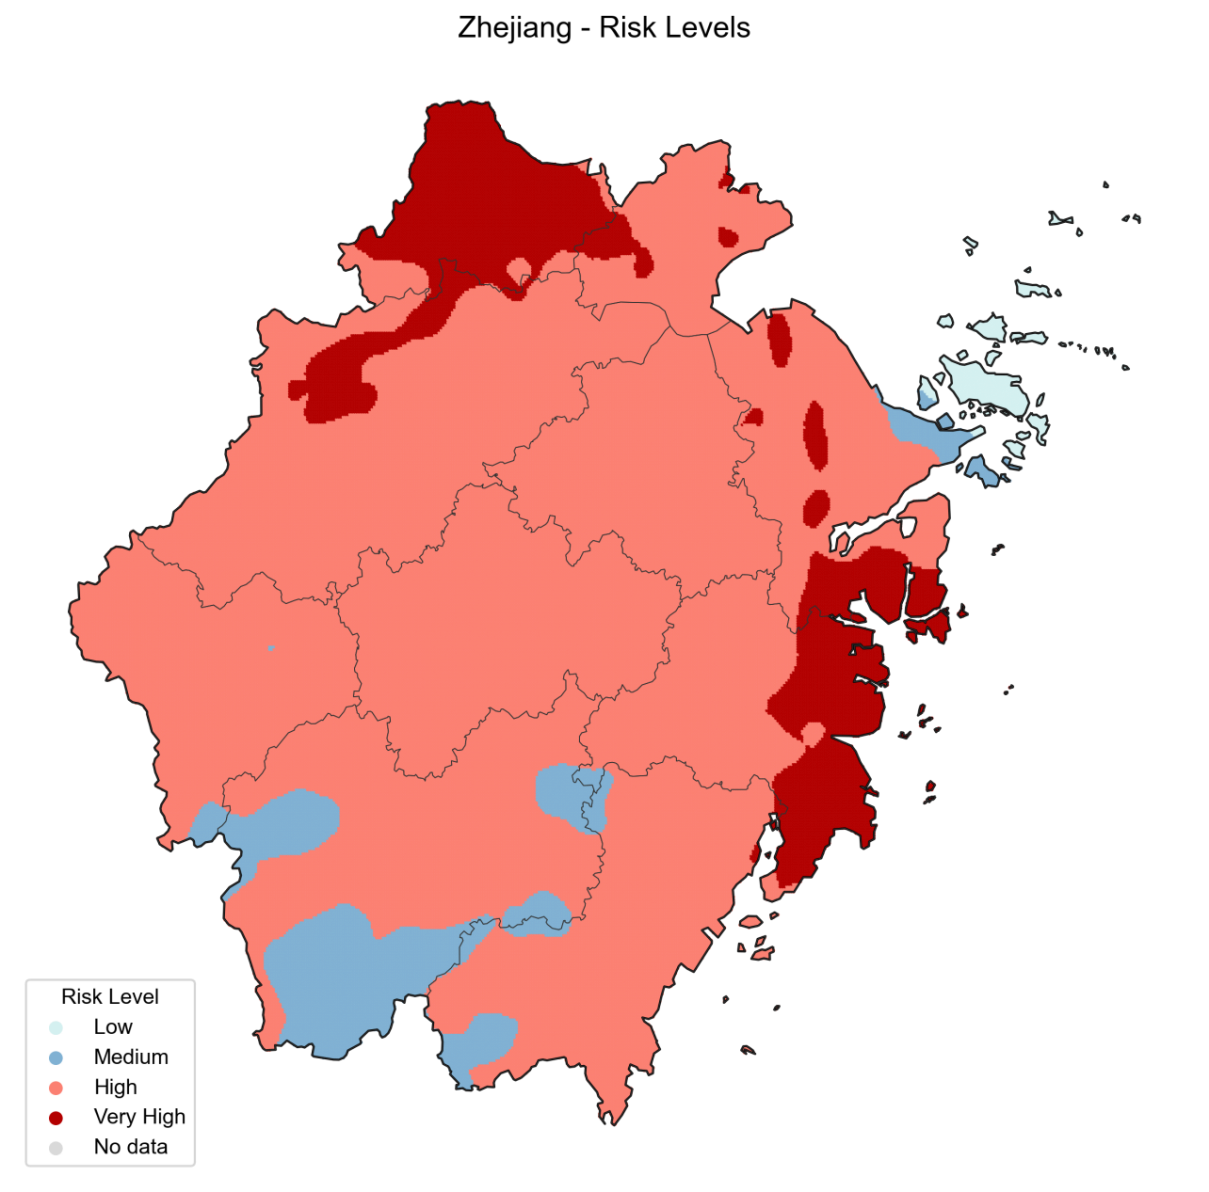


Figure S33. Zhejiang

Reference

1. Andraud M, Hens N, Marais C, Beutels P. Dynamic epidemiological models for dengue transmission: a systematic review of structural approaches. PLoS One. 2012;7(11):e49085.

2. Tang B, Xiao Y, Tang S, Wu J. Modelling weekly vector control against Dengue in the Guangdong Province of China. J Theor Biol. 2016;410:65-76.

3. Grunnill M, Boots M. How Important is Vertical Transmission of Dengue Viruses by Mosquitoes (Diptera: Culicidae)? J Med Entomol. 2016;53(1):1-19.

4. Delatte H, Gimonneau G, Triboire A, Fontenille D. Influence of temperature on immature development, survival, longevity, fecundity, and gonotrophic cycles of Aedes albopictus, vector of chikungunya and dengue in the Indian Ocean. J Med Entomol. 2009;46(1):33-41.

5. Liu X, Zhang M, Cheng Q, Zhang Y, Ye G, Huang X, et al. Dengue fever transmission between a construction site and its surrounding communities in China. Parasit Vectors. 2021;14(1):22.

6. Staples JE, Breiman RF, Powers AM. Chikungunya fever: an epidemiological review of a re-emerging infectious disease. Clin Infect Dis. 2009;49(6):942-8.

7. Wang T, Wang M, Shu B, Chen XQ, Luo L, Wang JY, et al. Evaluation of inapparent dengue infections during an outbreak in Southern China. PLoS Negl Trop Dis. 2015;9(3):e0003677.

8. Yasuno M, Tonn RJ. A study of biting habits of Aedes aegypti in Bangkok, Thailand. Bull World Health Organ. 1970;43(2):319-25.

9. Trpis M, Hausermann W. Dispersal and other population parameters of Aedes aegypti in an African village and their possible significance in epidemiology of vector-borne diseases. Am J Trop Med Hyg. 1986;35(6):1263-79.

10. Brady OJ, Johansson MA, Guerra CA, Bhatt S, Golding N, Pigott DM, et al. Modelling adult Aedes aegypti and Aedes albopictus survival at different temperatures in laboratory and field settings. Parasit Vectors. 2013;6:351.

11. Maciel-de-Freitas R, Codeço CT, Lourenço-de-Oliveira R. Daily survival rates and dispersal of Aedes aegypti females in Rio de Janeiro, Brazil. Am J Trop Med Hyg. 2007;76(4):659-65.

12. Chan M, Johansson MA. The incubation periods of Dengue viruses. PLoS One. 2012;7(11):e50972.

13. Duong V, Lambrechts L, Paul RE, Ly S, Lay RS, Long KC, et al. Asymptomatic humans transmit dengue virus to mosquitoes. Proc Natl Acad Sci U S A. 2015;112(47):14688-93.

14. Nguyet MN, Duong TH, Trung VT, Nguyen TH, Tran CN, Long VT, et al. Host and viral features of human dengue cases shape the population of infected and infectious Aedes aegypti mosquitoes. Proc Natl Acad Sci U S A. 2013;110(22):9072-7.

15. Nishiura H, Halstead SB. Natural history of dengue virus (DENV)-1 and DENV-4 infections: reanalysis of classic studies. J Infect Dis. 2007;195(7):1007-13.
